1 **Cell strain-derived induced pluripotent stem cell as a genetically controlled**  
2 **approach to investigating aging mechanisms and viral pathogenesis**

3  
4 Amanda Makha Bifani<sup>1</sup>, Hwee Cheng Tan<sup>1</sup>, Milly M Choy<sup>1</sup>, Eng Eong Ooi<sup>1,2,3,\*</sup>

5 <sup>1</sup>Programme in Emerging Infectious Diseases, Duke-NUS Medical School,  
6 Singapore

7 <sup>2</sup>Viral Research and Experimental Medicine Centre, SingHealth Duke-NUS  
8 Academic Medical Centre, Singapore

9 <sup>3</sup>Saw Swee Hock School of Public Health, National University of Singapore,  
10 Singapore

11 \*Correspondence: [engeong.ooi@duke-nus.edu.sg](mailto:engeong.ooi@duke-nus.edu.sg)

12

13 **ABSTRACT**

14 The expansion of the geographic footprint of dengue viruses (DENVs) and their  
15 mosquito vectors have affected more than half of the global population, including  
16 older adults who appear to show elevated risk of severe dengue. Despite this  
17 epidemiological trend, how age and senescence impact virus-host interactions  
18 involved in dengue pathogenesis to increase the risk of severe dengue is poorly  
19 understood. Herein, we show that conversion of diploid cells with finite lifespan into  
20 iPSCs followed by differentiation back into cell strain can be an approach to derive  
21 genetically identical cells at different stages of senescence to study virus and aging  
22 host interactions. Our findings show that cellular senescence impact the host  
23 response to infection and the ensuing outcome. We suggest iPSC-derive cell strains  
24 as a potentially useful technical approach to genetically controlled host-virus  
25 interaction studies to understand how aging impact viral pathogenesis.

26

27

## 28 INTRODUCTION

29 Dengue is the most common mosquito-borne viral disease globally (1). This acute  
30 disease, which when severe can be life-threatening, is caused by four genetically  
31 distinct dengue viruses (DENVs) (DENV1,-2,-3 and -4), all of which belong to  
32 *Flavivirus* genus. An estimated 390 million infections occur annually (2) and  
33 populations throughout the tropics face frequent and recurrent dengue epidemics.  
34 More are expected to be affected as the geographic footprint of the *Aedes*  
35 mosquitoes that transmit DENV expand from the tropical to the subtropical regions of  
36 the world (3).

37 When frequent and recurrent dengue epidemics first emerged in Southeast Asia  
38 after the Second World War, dengue was primarily a paediatric disease (4, 5). Early-  
39 life exposure to DENV remains enriched in children in certain parts of the region,  
40 leading to immunity by early adulthood (5). However, changes in the urban  
41 population demographics as well as vector distribution have led to a shift in the  
42 burden of dengue to include adults and even the elderly (6-10). Dengue in older  
43 adults present public health challenges as these individuals appear to experience  
44 greater morbidity and mortality rates (11). Epidemiological observations have found  
45 increased rates of hospital and intensive care admissions (11), length of  
46 hospitalisation (12), and risk of severe dengue (12-15). Although age is associated  
47 with increased prevalence of co-morbidities, such as cardiovascular diseases and  
48 diabetes that also complicate dengue (16, 17), age alone has also been shown to be  
49 a risk factor for severe dengue (12). This age-related increased risk of severe  
50 disease extends beyond dengue. Vaccination with the live attenuated yellow fever  
51 vaccine (YF17D) in those above 60 years of age has, despite the attenuated nature  
52 of YF17D, has been associated with severe viscerotropic infection and disease (18,  
53 19).

54 Despite the increased risk of poor clinical outcome in older adults, how aging affects  
55 the pathogenesis of DENV infection and severe adverse events following YF17D  
56 vaccination has remained undefined. A major limitation is the lack of suitable *in vitro*  
57 tools. Cell lines that are commonly used in virus-host interaction studies are immortal  
58 and do not age. Cell strains, or diploid cells with finite lifespan, do age (20).  
59 However, most of these cell strains were developed decades ago and are thus

60 mostly close to the end of their finite lifespan. Moreover, global stocks of several of  
61 these cell strains are approaching depletion (21). Cell strains at a spectrum of  
62 chronological ages are thus not readily available for virus and aging host interaction  
63 studies.

64

65 Herein, we explored the use of induced pluripotent stem cells (iPSCs) generated  
66 from senescent diploid cells, and then differentiated from iPSCs back into senescent  
67 cells as a resource for age-dependent viral pathogenesis investigations; conversion  
68 of diploid cells to iPSCs serve as a renewable resource for differentiation and  
69 passaging into genetically identical cells at different stages of senescence. We show  
70 that early passages of differentiated cells display markers of differentiation while later  
71 passage cells exhibit cellular senescence. The difference in passage number  
72 influences the flavivirus infection phenotype, potentially offering an *in vitro* system to  
73 study host immune response to infection in the context of cellular senescence.

74

## 75 RESULTS

76

### 77 **Senescent cell strains can be reprogrammed into induced pluripotent stem**

78 **cells.** Cell strains, WI-38 and MRC-5 were created as cancer free, virus free cells for  
79 vaccine production (20, 22). These diploid cell strains, however, have since proven  
80 useful for *in vitro* cell biology and basic virology studies as they are not immortalised  
81 (23, 24). We reprogrammed these cell strains into iPSCs using non-modified of  
82 Yamanaka factors (Klf4, Oct4, Sox2 and c-Myc) as well as the transcription factors  
83 Nanog and Lin28 (25) rather than conventional dedifferentiating techniques such as  
84 retro- or lentivirus vectors that alter the host cell genome (Figure 1). Fourteen days  
85 post-transfection with the cocktail of reprogramming mRNA, three suspected iPSC  
86 colonies were isolated from WI-38 (W1-3) and 6 colonies from MRC-5 cells (M1-6).

87

88 *Figure 1. Senescent cell strains WI-38 and MRC-5 can be reprogrammed to iPSCs.*  
89 *(A-B) Karyogram of WI-38 derived iPSC colony W1 (a) and of MRC-5 derived iPSC*  
90 *colony M3 (b) (GTG-banded cells analysed, n=20. Karyograms made, n=5). (C)*  
91 *Immunofluorescence assay employing anti-Tra-1-60 (1/500), anti-oct4 (1/250) and*  
92 *nuclear stain DAPI (1/10000) in parent WI-38 and MRC-5 fibroblasts as well as W1*  
93 *and M3 iPSCs at 10X magnification. (D-E) Quantitative PCR of fibroblast associated*  
94 *genes and iPSC marker genes in parental cell strains and de-differentiated iPSCs.*  
95 *Statistical analysis was performed using students t-test (each dot represents 1*  
96 *experiment, n=3 biological replicates/experiment, \*p ≤ 0.05, \*\*p ≤ 0.01, \*\*\*p ≤ 0.001,*  
97 *\*\*\*\*p ≤ 0.0001).*

98

99 To verify that a diploid genome was maintained through reprogramming from  
100 senescent fibroblasts to iPSCs, karyotyping was done for all three WI-38 derived  
101 colonies and six MRC-5 derived colonies. Colony W1 retained diploid karyotype  
102 (Figure 1a) while colonies W2 and W3 exhibited heterogeneous karyotypes  
103 (Supplementary Figure S1a). All six colonies isolated from MRC-5 (M1 to M6)  
104 preserved their diploid phenotype (Figure 1b; Supplementary Figure S1a).

105

106 Colonies W1 and M3, were conveniently selected for further characterisation. We  
107 found increased expression of iPSC cell surface marker TRA-1-60 and transcription

108 factor OCT 4 in these colonies (Figure 1c). Reprogramming from fibroblasts to iPSCs  
109 was further confirmed at the level of transcription by significantly decreased  
110 expression of fibroblast associated genes (*acta2*, *col3a1*, *fsp*, *ltbp2*, *timp1* and *vim*)  
111 and increased expression of iPSC gene markers (*dmnt3b*, *htert*, *nanog*, *oct4*, *sox2*  
112 and *tdgf1*) relative to the parental fibroblasts (Figure 1d-e).

113

114 A hallmark of cell strains WI-38 and MRC-5 fibroblasts is that they undergo  
115 senescence (20) due to lack of expression of human telomerase (hTERT) which  
116 prevents telomere shortening. We thus measured hTERT expression in our colonies.  
117 Expression of hTERT was upregulated in W1 and M3 iPSCs as compared to their  
118 respective parental fibroblasts (Figure 1e).

119

120 Stemness was also validated through measuring alkaline phosphatase (AP) activity,  
121 which is present in stem but not differentiated cells. Indeed, parental WI-38  
122 fibroblasts stained negative for AP while W1 and M3 iPSCs demonstrated positive  
123 pink staining of AP activity (Supplementary Figure S1b).

124

125 We further tested if these iPSCs were indeed pluripotent by showing that these cells  
126 were capable of differentiation into the three germ layers. The iPSCs were exposed  
127 to differentiation media for either endoderm, ectoderm or mesoderm lineages.  
128 Lineage differentiation was confirmed based on increased expression of lineage  
129 specific markers (endoderm: *sox17*, *gata6*, *foxa2*; mesoderm: *ncam1*, *hand1*, *msx1*;  
130 ectoderm: *otx2*, *pax6*, *lhx2*) (Supplementary figure S1c) matched by decreased  
131 expression of iPSC markers (*nanog*, *sox2*, *oct4*) (Supplementary figure S1d). Taken  
132 collectively, these multiple lines of evidence suggested that WI-38 and MRC-5 were  
133 successfully reprogrammed to W1 and M3 iPSCs.

134

135 **IPSC-derived differentiated cells undergo senescence.** To derive differentiated  
136 cells from iPSCs, we added a chemically defined media to the iPSCs and passaged  
137 the cells four times (Figure 2a). Stem cell morphology was lost upon differentiation  
138 from iPSC to a differentiated cell (Figure 2b). Furthermore, there was a significant  
139 decrease in iPSC marker genes upon differentiation in both W1 and M3  
140 differentiated cells at every passage post differentiation (Figure 2c-d). However, after  
141 four passages, the cells could no longer be maintained in culture and perished.

142 *Figure 2. iPSCs can be differentiated back into cell strains. (A) Schematic depicting*  
143 *the protocol for define differentiation of iPSCs. Image made in BioRender. (B-C)*  
144 *Quantitative PCR of iPSC marker genes in W1 (B) and M3 (C) iPSCs and the*  
145 *differentiated cells derived from these respective iPSCs, at P1-P4. (D) Bright field*  
146 *images of W1 cells prior to differentiation, during differentiation and following*  
147 *differentiation at passage 1 and 4 at 10X magnification. (E) Hierarchical clustering of*  
148 *microarray gene expression from passage 1 to 4 of W1-derived differentiated cells.*  
149 *\* $p \leq 0.05$ , \*\* $p \leq 0.01$ , \*\*\* $p \leq 0.001$ , \*\*\*\* $p \leq 0.0001$ .*

150

151 To gain insights into the differences between passage 1 (P1) to P4 differentiated  
152 cells, we analysed whole genome expression of these cells using microarray.  
153 Hierarchical clustering of differentially expressed genes from P1 through P4 of W1  
154 differentiated cells revealed distinct patterns at P1 and P4 (Figure 2e). Gene  
155 expression patterns at P2 and P3 were intermediate to those of P1 and P4 (Figure  
156 2e).

157

158 Pathway analysis of genes differentially expressed at P2, P3 and P4 compared to P1  
159 defined the differences between the cells at different passages. Few genes were  
160 significantly (adjusted p-value < 0.05) up (n = 14) or down (n=85) regulated from P1  
161 to P2. The top hits of upregulated genes were related to cell differentiation processes  
162 (Figure 3a), whereas the downregulated genes did not significantly associate with a  
163 specific pathway (Supplementary figure 2a). The comparison between P1 against P3  
164 and P4 cells yielded interesting findings. Senescence and autophagy in cancer cells  
165 emerged as the second top pathway in both analyses (Figure 3a). Other aging-  
166 related pathways that were highlighted in our analysis were complement and  
167 coagulation cascades, hypothesized pathways in cardiovascular disease and  
168 genotoxicity. Interestingly, acute inflammation was also upregulated at P4 (Figure  
169 3a), which is supportive of the notion of inflammaging - an increase in basal  
170 inflammation in elderly individuals (26). These findings were matched with significant  
171 downregulation of pathways associated with DNA replication and the cell cycle  
172 (Supplementary figure 2c). Differential expression of genes associated with  
173 senescence (*serpine1*) and acute inflammation (*icam1*) were validated by qPCR of  
174 W1 and M3 differentiated cells at P1 and P4 (Supplementary figure 2d).

175 *Figure 3. iPSC-derived differentiated cells undergo senescence. (A) Pathway*  
176 *analysis of upregulated genes in P1 vs either P2, P3 or P4 of W1 differentiated cells*  
177 *using the WikiPathways 2019 Human database. Pathways are shown in order of*  
178 *significance, with the most significantly upregulated pathway at the top. (B-C)*  
179 *Population doubling time of W1 and M3 differentiated cells at P1 and P4 over 48*  
180 *hours of observation.*

181

182 The senescent phenotype was phenotypically validated by measuring population  
183 doubling times at passage one and four in differentiated cells. Aging cells have  
184 previously been shown to have slower population doubling times. Both W1 and M3-  
185 derived differentiated cell demonstrated slower population doubling time at later  
186 passages (Figure 3b-c).

187

188 **Differentiated cells but not iPSCs are susceptible to DENV infection.** Stem cells  
189 have recently been shown to be less susceptible to viral infection through intrinsic  
190 expression of interferon stimulated genes (ISGs) independent of interferon $\beta$  (IFN $\beta$ )  
191 activity (27). We thus measured a selection of these previously identified ISGs by  
192 qPCR in our iPSCs and compared to their parental fibroblasts to ensure that our  
193 iPSCs showed the same ISG expression profile as those previously reported (27).  
194 We found that the ISGs - *alyfref*, *eif3l*, *pabpc4*, *ptma* and *ybx3* - were intrinsically  
195 expressed and were significantly upregulated in the iPSCs compared to their  
196 parental fibroblasts (Figure 4a).

197

198 *Figure 4. iPSCs are resistant to flaviviral infection through an IFN $\beta$  independent*  
199 *mechanism. (A) Quantitative PCR of ALYFREF, EIF3L, PABPC4, PTMA and YBX3*  
200 *(stem cell interferon independent ISGs) in W1 and M3 iPSCs. Their respective*  
201 *parental cell strains were included as controls. (B-C) RT-PCR of genome copies of*  
202 *DENV2 16681 and ZIKV HPF/2013 from the supernatant of infected cell strains and*  
203 *iPSCs at 72 hours post infection (hpi) in M3 and W1 iPSCs. (D-E) Quantitative PCR*  
204 *of interferon and interferon stimulated genes in iPSCs and parental cell strains MRC-*  
205 *5 (D) and WI-38(E) infected with ZIKV (HPF/2013) or DENV2 (16681) relative to the*  
206 *respective uninfected control cell.*

207



208 Along with the intrinsically expressed ISGs, our iPSCs were less susceptible to  
209 DENV and ZIKV infection. Inoculation of wild type DENV2 (16681 strain) and Zika  
210 virus (ZIKV) (HPF/2013 strain) onto iPSCs resulted in significantly reduced viral  
211 genome copies at 72 hours post infection (hpi) compared to infection in their  
212 respective parental fibroblasts (Figure 4b-c). Similar differences were observed when  
213 infection was assayed for infectious viral progenies (Supplementary figure 3a).  
214 Furthermore, there was a significantly attenuated type I interferon response during  
215 infection with both viruses in both iPSCs relative to the original fibroblasts (Figure 4d-  
216 e; Supplementary figure 3b-c), consistent with previous observations (27).

217

218 We next asked if cell susceptibility to viral infection could be restored in iPSC-derived  
219 differentiated cells. W1 differentiated cells were infected with DENV2 16681, while  
220 M3 differentiated cells were infected at passages 1 and 4. We found infectious  
221 DENV2 particles in the supernatant of W1 and M3 differentiated cells at 48 hpi  
222 (Figure 5a); the plaque titres were, however, not significantly different. DENV2  
223 genomic RNA in the supernatant of infected W1 cells showed an increasing trend  
224 with increasing number of passages although this difference was also not statistically  
225 significant (Figure 5b). No difference was seen in DENV2 16681 RNA levels in P1  
226 compared to P4 M3 cells (Figure 5b). These findings thus indicate that susceptibility  
227 to DENV infection was restored in iPSC-derived differentiated cells.

228

229 *Figure 5. Susceptibility to DENV infection is restored in iPSC-derived differentiated*  
230 *cells. (A) DENV2 16681 progenies produced at 48hpi in P1-P4 W1-derived*  
231 *differentiated cells and M3 differentiated cells at P1 and P4. (B) Genomic RNA*  
232 *recovered from the supernatant of DENV2 16681 infections at 48hpi in W1- and M3-*  
233 *derived differentiated cells. (C) Principal component analysis (PCA) of gene*  
234 *expression data from W1 differentiated cells infected with DENV2 or mock infected*  
235 *at P1 and P4. P1 cells are shown in smaller dots whereas P4 are larger. (D-E)*  
236 *Volcano plot of gene expression changes in DENV2 16681 infected W1-derived*  
237 *differentiated cells compared to mock infection at P1 and P4. Values above the*  
238 *horizontal line are statistically significant. Vertical lines depict the Log<sub>2</sub> cut off*  
239 *assigned to genes that are differentially expressed. (F-G) Quantitative PCR of iPSC*  
240 *antiviral genes identified in the microarray analysis (IFIT1, IFI6, IFN $\beta$ , OAS1,*

241 *CXCL10*) during infection with DENV2 16681 at P1 and P4 in infected and  
242 uninfected cells. (H) *IFN $\beta$*  expression in infected W1 differentiated cells at P1 vs P4.

243

244 **Aging cell related differences in host response to DENV infection.** Given the  
245 differences in baseline gene expression upon passage of these iPSC-derived  
246 differentiated cells (Figure 3a), we next explored if the host response to DENV2  
247 16681 infection was different despite producing similar levels of viral progenies.  
248 Gene expression of both infected and mock infected P1 cells clustered together. In  
249 contrast, infected P4 cells clustered separately from their mock infected controls  
250 (Figure 5c). Only one single gene of unknown function was significantly upregulated  
251 in response to DENV2 16681 infection in P1 cells (Figure 5d). This finding is  
252 interesting as P1 cells partially resembled CD33+ myeloid cells and would be  
253 expected to be more prone to pro-inflammatory response, if the host response to  
254 infection was influenced more by cell type rather than age. In contrast, 354 genes  
255 were found to be differentially expressed between DENV2 16681 infected and mock  
256 infected P4 cells (Figure 5e). Many of these genes showed a large fold change,  
257 especially those that belong to the canonical *IFN $\beta$*  antiviral response pathway  
258 (Figure 5e). The differentially expressed *IFN $\beta$*  and related genes identified in the  
259 microarray analysis were validated through qPCR (Figure 5f-g). Indeed, *IFN $\beta$*   
260 expression was significantly lower in P1 compared to P4 DENV2 infected cells  
261 (Figure 5h). The increase in antiviral response at later passages was also observed  
262 by qPCR in M3 differentiated cells (Supplementary figure 4).

263

264 To determine if the response of the differentiated cells to infection was generic or  
265 specific to DENV2 16681, we examined infection outcome in our iPSC-derived  
266 differentiated cells using the attenuated DENV2 PDK53 and YF17D. DENV2 PDK53  
267 was derived from its wild-type 16681 parent through *in vitro* serial passaging. Its  
268 genome is thus composed of the 16681 genome but with 5 amino acid and 1  
269 nucleotide substitutions, the latter in the 5' untranslated region of the genome.  
270 Despite these small number of genomic differences, infection with PDK53 produced  
271 reduced levels of infectious progenies in higher passaged cells (Figure 6a).  
272 Furthermore, unlike 16681 infected P1 cells that showed minimal transcriptional level  
273 changes, PDK53 infection induced *IFN $\beta$*  expression that was greater than 6 Log<sub>2</sub>fold

274 change compared to mock infected P1 and P4 cells (Figure 6b). Similar trends were  
275 also observed with the expression of ISGs (Figure 6c-d, Supplementary figure 5a-b).

276

277 *Figure 6. Infection outcome in iPSC-derived differentiated cells is virus-specific. (A)*  
278 *Infectious DENV2 PDK53 particles 48hpi in W1 differentiated cells at passage 1*  
279 *through 4 and M3 differentiated cells at passage 1 and 4. (B) IFN $\beta$  expression in P1*  
280 *and P4 W1- and M3-derived differentiated cells infected with PDK53. (C-D) IFIT1,*  
281 *IFI6, IFN $\beta$ , OAS1, CXCL10 gene expression upon DENV2 PDK53 compared to*  
282 *mock infection in P1 (C) and P4 (D) M3-derived differentiated cells. (E) YF17D*  
283 *infectious viral progeny recovered at 48 hpi in P1-P4 W1-derived differentiated cells.*  
284 *(F-G) W1-derived differentiated cells IFIT1, IFI6, IFN $\beta$ , OAS1, CXCL10 gene*  
285 *expression at 48 hours post YF17D infection. (H) YF17D infected W1-differentiated*  
286 *cell's IFN $\beta$  expression at P1 vs P4.*

287

288 Infection with the YF17D produced the opposite trend compared to PDK53. YF17D  
289 infection showed increased virus replication with increasing passage number of  
290 differentiated cells (Figure 6e; Supplementary figure 5c) despite increased  
291 expression of IFN $\beta$  and ISGs (Figure 5f-h; Supplementary figure 5d-f). This  
292 observation is particularly interesting as YF17D vaccination is known to be  
293 associated with increased risk of viscerotropic infection and disease in older adults  
294 (28). Collectively, our findings suggest that the host response to infection is not  
295 generic in our iPSC-derived differentiated cells but are rather age-dependent and  
296 could potentially inform on age-related host response to flaviviral infection.

297

298

## 299 DISCUSSION

300

301 Dengue in older adults have shown worse clinical outcome compared to their  
302 younger counterparts (11). DENV infection in elderly patients often presents  
303 atypically and complicates clinical diagnosis (8, 15, 29). They are also more likely to  
304 have had prior exposure to DENV and are thus at greater risk of antibody-dependent  
305 enhancement upon secondary infection with a heterologous DENV (30) (31). The  
306 prevalence of co-morbidities, such as diabetes and hypertension, increase with age  
307 and several of these have been linked with increased risk of severe dengue (16, 17,  
308 32). However, there could also exist age-related host factors, including  
309 immunosenescence, the decline of the immune system with age, or inflammaging,  
310 an increase in basal inflammation with age, that may elevate the risk of older  
311 individuals to severe dengue (33). Thus, despite the known poorer clinical outcome  
312 of dengue in older adults, the pathogenic underpinnings of DENV infection in aged  
313 cells have remained undefined.

314

315 A major limiting step to understanding age-related differences in host-virus interactions  
316 is the lack of suitable *in vitro* tools to simulate senescence. Commonly used cell lines  
317 are immortal and thus poorly reflect the processes of aging. Cell strains, such as WI-  
318 38 and MRC-5 undergo senescence (20, 24). Age associated changes in gene  
319 expression may influence outcome of DENV infection. Indeed senescent monocytes  
320 have been shown to have increased DENV susceptibility via increased expression of  
321 receptor DC-SIGN (34). Moreover, cell strains also have the advantage of having  
322 diploid genomes that could be more accurate than cell lines in reflecting the  
323 transcriptional responses that happens in dengue patients. Unfortunately, due to their  
324 limited lifespan, global stocks of these diploid cell strains are limited. WI-38 diploid  
325 fibroblasts have been used to near exhaustion since their isolation. Thus, remaining  
326 supplies are constrained to high passaged senescent cells (21, 24). Without ready  
327 access to paired low and high passaged cells, WI-38 and MRC-5 have limited potential  
328 as tools to dissect age-related host-virus interactions that underpin pathogenesis. Our  
329 work thus overcomes this limitation through the derivation of iPSCs from WI-38 and  
330 MRC-5. The reprogrammed iPSCs could be differentiated and passaged for infection  
331 experiments.

332

333 We have used a chemically defined media to differentiate the iPSCs into an adherent  
334 cell monolayer, that was followed through serial passaging. We have used this  
335 relatively straightforward approach as a proof-of-concept demonstration of W1-38 and  
336 MRC-5 derived iPSCs and iPSC-derived differentiated cells as *in vitro* models to study  
337 age-related effects on viral infection. Indeed, our transcriptional analysis showed that  
338 the baseline expression of aging-related genes were increased upon passaging of W1  
339 and M3 cells. To our knowledge, such an approach to derive isogenic cells of different  
340 replicative ages for infection studies has not been previously attempted. Future studies  
341 could make use of better defined differentiation protocols using well established kits.  
342 Alternatively, iPSCs could also be differentiated through the use of transcriptions  
343 factors computationally predicted by mognify (35) or epimognify (36). Furthermore, as  
344 the process of differentiation does not occur uniformly throughout a culture, single-cell  
345 sequencing would enable us to compare homogenous cell types within a  
346 heterogeneous population at various replicative ages.

347

348 We found interesting differences in the virologic outcome and host response to  
349 infection in both W1- and M3-derived cells. DENV2 16681 infection produced no  
350 difference in the amount of progeny virus across the different passages iPSC-  
351 derived differentiated cells. Conversely, infection with its attenuated derivative,  
352 DENV2 PDK53, produced significantly reduced viral progenies with increasing  
353 number of passages. This finding is interesting as we have previously found DENV2  
354 PDK53 infection to be restricted by the innate immune response, which may also  
355 explain its attenuated phenotype (37, 38). Despite the production of comparable  
356 levels of DENV2 16681, infection with this virus in P1 to P4 iPSC-derived  
357 differentiated cells produced vastly different responses in gene expression. P4 cells  
358 produced more genes with greater fold change in infected compared to uninfected  
359 cells than P1 cells. Many of these genes, such as *il1a* or *serpine1*, are in the innate  
360 immune and pro-inflammatory pathways. These findings suggest that for any given  
361 viral load, older adults may respond differently compared to the younger dengue  
362 patients with a more pronounced inflammatory response and hence explain their  
363 increased risk in severe dengue.

364

365 The possibility that this *in vitro* approach could reflect, at least partially, age-related  
366 clinical outcome of infection is further supported by our observations on YF17D

367 infection. Vaccination of individuals over 60 years of age with YF17D has been  
368 linked with severe adverse events (18) and viscerotropic disease (28), the latter  
369 possibly explained by increased burden of live attenuated YF17D infection. YF17D  
370 infection in our passaged cells produced higher levels of infectious particles with  
371 increasing number of passages. The increase in YF17D progenies occurred despite  
372 increased IFN $\beta$  expression at later passages. This observation suggests that other  
373 YF17D-host interactions may underpin infection outcome in aged cells and hence  
374 alter their risk of severe adverse events following YF17D vaccination.

375

376 In conclusion, our findings suggest the feasibility of using iPSC-derivatives of WI-38  
377 and MRC-5 cell strains as a resource to elucidate how aging impact host-virus  
378 interactions that underpin dengue and other flaviviral pathogenesis.

379

380

## 381 **MATERIALS AND METHODS**

382 **Cells and culture conditions.** Human diploid fibroblast WI-38 (female) and MRC-5  
383 (male) cell strains were maintained in fibroblasts growth media (Minimum Essential  
384 Media, 10% FCS, 1% GlutaMAX, 1% penicillin/streptomycin) at 37°C, 20% O<sub>2</sub>, 5%  
385 CO<sub>2</sub>. Cell strains were passaged with TrypLE™ Expression Enzyme. BHK21 cells used  
386 for plaque assay were grown in RMPI Medium 1640 (Gibco), 2% FCS and 1%  
387 penicillin/streptomycin at 37°C, 20% O<sub>2</sub>, 5% CO<sub>2</sub>.

388  
389 All stem cells were cultivated on 1% Geltrex™ coated cell culture ware in mTeSR™1  
390 or TeSR™-E8™ media for maintenance. Stem cells were passaged according to  
391 manufacturers' recommendations with ACCUTASE™ or ReLeSR™ where appropriate.  
392 Briefly, spent media was removed from the stem cells and ReLeSR™ was added and  
393 incubated at room temperature for one minute. ReLeSR™ was then removed, cells  
394 were incubated at 37°C, 20% O<sub>2</sub>, 5% CO<sub>2</sub> for 6:30min, fresh media was added gently,  
395 and cells were re-suspended by tapping the plate for 1min. ACCUTASE™ was added  
396 to cells and incubated for 7min at 37°C, 20% O<sub>2</sub>, 5% CO<sub>2</sub>. Cells were resuspended,  
397 transferred to a conical tube and spun at 250 x g for 5min at room temperature. The  
398 ACCUTASE™ was then removed and cells were re-suspended in desired media with  
399 10µM ROCK inhibitor Y-27632.

400  
401 **Virus stocks.** Dengue strains (DENV2 16681 and DENV2 PDK53) were gifted by Dr  
402 Claire Huang (Centre for disease control and prevention, USA). Clinical isolate Zika  
403 virus HPF13/2013 (KJ776791) was acquired by the European Virus Archive. Yellow  
404 fever YF17D was isolated from a vial of Stamaril® live attenuated vaccine. All flavivirus  
405 stocks were maintained in insect C6/36 cells at 30°C.

406  
407 **Reprogramming diploid fibroblasts to iPSCs.** Human diploid fibroblast cell strains  
408 WI-38 and MRC-5 were reprogrammed to iPSCs using the StemRNA™-NM  
409 reprogramming kit according to manufacturers' instructions for adult and neonatal  
410 human fibroblasts. Briefly, cell strains were seeded on 6 well plates coated with 1%  
411 Geltrex™ LDEV-Free Reduced Growth Factor Basement Membrane Matrix at a  
412 density of 2 x 10<sup>5</sup> cells per well in fibroblast expansion media (Advanced DMEM, 10%

413 FCS, 1% Glutamax) and incubated at 20% O<sub>2</sub>, 37°C overnight. Subsequently, spent  
414 media was replaced with NutriStem Media and incubated in at 37°C for 6 hours prior  
415 to introduction of the NM-RNA reprogramming cocktail with Lipofectamine<sup>®</sup>RNAiMAX<sup>™</sup>  
416 Transfection Reagent in Opti-MEM<sup>®</sup> Reduced Serum Medium. Fresh Nutristem Media  
417 and NM-RNA reprogramming cocktail was refreshed daily for the course of four days.  
418 Cells were subsequently maintained in Nurtistem media until iPSC colonies could be  
419 identified (~14 days). Contrary to manufacturer's instructions, reprogramming was  
420 carried out at 20% O<sub>2</sub> rather than ≤5% O<sub>2</sub>.

421  
422 Potential colonies of iPSCs were manually isolated using a micropipette with a 20μl  
423 tip and transferred to a fresh 1% Geltrex<sup>™</sup> coated 6 well plate containing mTeSR<sup>™</sup>1  
424 maintenance media for propagation according to manufacturers' instructions.

425  
426 **Gene expression quantification.** Relative changes in gene expression of lineage  
427 specific markers were measured by qPCR. Briefly, cellular RNA was isolated following  
428 the RNeasy Mini Kit, and converted to cDNA via qScript standard protocol. QPCR  
429 were performed using LightCycler<sup>®</sup> 480 SYBR Green I Master under the conditions on  
430 LightCycler<sup>®</sup> 480 II using LightCycler<sup>®</sup> 480 software (v.1.5). Gene expression primers  
431 can be found in supplementary table 1.

432  
433 **Immunofluorescent assay.** Primary antibodies against iPSC markers TRA-1-60  
434 (ab16288, Abcam<sup>®</sup>, 1/500) and OCT4 (ab181557, Abcam<sup>®</sup>, 1/250) were used for  
435 immunofluorescence assays to determine the expression of stem cell proteins in  
436 iPSCs or fibroblasts. Spent media was removed, cells were washed once with PBS  
437 and subsequently dislodged using ACCUTASE<sup>™</sup> according to manufacturers'  
438 instructions. The cells were spun down at 250 x g for 5min at room temperature and  
439 the supernatant was decanted. Pelleted cells were re-suspended in 250μL PBS. Two  
440 microliters of re-suspended cells were aliquoted on to 30 well microscope slides  
441 (TEKDON incorporated, Slide ID:30-30), allowed to air dry and fixed in acetone for  
442 10min at room temperature. Slides were washed in a 50mL conical tube containing  
443 PBS for 5min at room temperature three times before primary antibody was applied  
444 and incubated for 1-2 hours at 37°C. The slides were washed three times with PBS at  
445 room temperature for 5 minutes. Anti-mouse or anti-rabbit secondary antibody was



446 applied where appropriate and incubated for 30 minutes at 37°C. Slides were rinsed  
447 with PBS at room temperature for 5 minutes three times. The SlowFade™ Antifade Kit  
448 was used as a mounting medium as well as to stain the cellular DNA with DAPI. Slides  
449 were visualised on a Nikon Eclipse 80i microscope with Nikon Intensilight C-HGFI at  
450 10X magnification and imaged with Nikon Digital Sight camera using NIS Elements  
451 Imaging Software (v.3.22.15).

452

453 **Trilineage differentiation of iPSCs.** Pluripotency was confirmed using STEMdiff™  
454 Trilineage Differentiation Kit according to manufacturers' instructions. Stem cells were  
455 harvested using ACCUTASE™ and seeded on 24 well plates coated with 1% Geltrex  
456 at  $1 \times 10^5$  cells per well for mesoderm differentiation and  $1 \times 10^5$  cells per well for  
457 ectoderm and endoderm differentiation in their respective differentiation medium.  
458 Differentiation to endoderm, ectoderm and mesoderm was assessed by qPCR as  
459 described earlier using lineage specific primers (Supplementary table 1).  
460 Differentiated cells gene expression was assessed against undifferentiated iPSC  
461 control.

462

463 **Stem cell differentiation.** The spent medium of W1 iPSCs was removed and the cells  
464 were treated with ACCUTASE™ and incubated for 7min at 37°C, 20% O<sub>2</sub>, 5% CO<sub>2</sub>.  
465 Cells were dislodged, transferred to a 15mL conical tube, spun at 250 x g for 5 min at  
466 room temperature, the supernatant was decanted and pelleted cells were re-  
467 suspended in 3mL TeSR™-E8™ in the presence of 10µM Y-27632. Cells were later  
468 seeded on 6 wells plates coated with 1% Geltrex™ at a density of  $2 \times 10^5$  cells/well in  
469 TeSR™-E8™ supplemented with Y-27632 and kept at 37°C, 5% CO<sub>2</sub>. Two days later,  
470 spent medium was removed and replaced with differentiation medium (DMEM/F12,  
471 1% ITS, 0.001nM isoprenaline, 100ng/mL BMP-4, 20ng/mL bFGF and 0.1µM Retinoic  
472 acid) and incubated at 37°C, 20% O<sub>2</sub>, 5% CO<sub>2</sub> for four days. Cells were then imaged  
473 and maintained in culture or the RNA was extracted for qPCR to assess iPSC markers  
474 as previously described. Differentiated cells were maintained in DMEM supplemented  
475 with 1% Penicillin/streptomycin, 10% Foetal calf serum, 1mM L-glutamine at 37°C, 5%  
476 CO<sub>2</sub> thereafter.

477

478 **Alkaline Phosphatase Activity.** Undifferentiated cells were characterized by  
479 upregulated alkaline phosphatase activity compared to terminally differentiated cells.  
480 Human diploid fibroblasts and iPSCs were seeded in triplicates at  $1 \times 10^5$  cells/well of  
481 fibroblasts or 200 clumps/well for the iPSCs. Alkaline phosphatase activity was  
482 measured using the StemAb Alkaline Phosphatase Staining Kit II in accordance with  
483 manufactures' guidelines. Cells were imaged on an Olympus DP71 with Olympus  
484 TH4-200 camera and recorded with CellSens imaging software.

485

486 **Viral infections.** Infections were performed on senescent cells strains, iPSCs and  
487 differentiated with dengue 2 wild type strain 16681, dengue 2 vaccine strain PDK53,  
488 Zika wild type stain HPF/2013 or yellow fever vaccine strain 17D. Fibroblasts were  
489 seeded in a 24 well plate and kept at 37°C, 20% O<sub>2</sub>, 5% CO<sub>2</sub> overnight. Spent medium  
490 was removed, cells were counted and infected at an MOI of 1 for 1hour at 37°C, 5%  
491 CO<sub>2</sub> in MRC-5 and WI-38 fibroblasts as well as their respective iPSCs. Differentiated  
492 cells were infected with virus at an MOI of 0.1 for 1 hour in 37°C, 5% CO<sub>2</sub>. Virus  
493 inoculum was removed and replaced with fresh media. Fibroblasts and differentiated  
494 cells were incubated at 37°C, 5% CO<sub>2</sub> for 48 hours while iPSCs were incubated for 72  
495 hours. The supernatant was harvested for plaque assay and qRT-PCR of the viral  
496 genome. Cells were collected for RNA extraction followed by qRT-PCR.

497

498 **Infection quantification.** Infectious particle quantification was determined via plaque  
499 assay. Briefly, BHK21 cells were seeded at  $2 \times 10^5$  cells/well in a 24 well plate in RPMI  
500 medium supplemented with 2% FCS and 1% penicillin/streptomycin. Once confluency  
501 was reached, the BHK21 cells were infected with a 10-fold serial dilution of 100 $\mu$ L of  
502 virus and incubated at 37°C, 20% O<sub>2</sub>, 5% CO<sub>2</sub> for 1 hour, with plate agitation at 15  
503 minute intervals. Subsequently, viral inoculum was removed, 0.8% carboxymethyl  
504 cellulose (CMC) in RPMI medium supplemented with 3% FCS and  
505 penicillin/streptomycin was added and plates were incubated at 37°C, 20% O<sub>2</sub>, 5%  
506 CO<sub>2</sub> for six days. Cells were then fixed in 20% formalin for at least 30 minutes before  
507 rinsing with water. Plates treated with 1% crystal violet (Sigma-Aldrich), washed and  
508 air-dried to count plaques.

509

510 Viral genome copy number was quantified by qRT-PCR using CDC primers and  
511 probes as previously described for dengue virus (39) and zika virus (40). Briefly,  
512 virus genomic RNA was extracted from the supernatant using QIAamp Viral RNA  
513 Mini Kit according to manufacturer's instructions. Purified RNA was then quantified  
514 by qPCR following the qScript One-Step RT-PCR Kit protocol using the CDC  
515 specified primers and probes on the LightCycler® 480 II.

516

517 **Microarray analysis.** RNA was extracted from infected and uninfected differentiated  
518 cells at 48 hours post infection using the RNeasy Micro Kit. Microarray analysis was  
519 done using the GeneChip™ Human Gene 2.0 ST array. Analysis was carried out using  
520 the Partek® gene expression suit. A list of differentially expressed genes were  
521 selected based on a FDR adjusted p-value of <0.05 and a gene expression difference  
522 of at least Log<sub>2</sub>fold-change of 2. Hierarchical clustering was carried out on the genes  
523 lists generated. Pathway analysis was done on Enrichr using WikiPathways.

524

525 **Population doubling of differentiated cells.** Cells were seeded at  $5 \times 10^4$  cells/well  
526 in a 24 well plate. At 24 hours and 48 hours, cells were washed with PBS and treated  
527 with trypsin. The dislodged cells were counted in triplicate. Population doubling time  
528 was calculated from the number of cells at 0, 24 and 48 hours post seeding.

529

530 **Quantification and statistical analysis** – All statistical analyses were performed  
531 using GraphPad Prism (v.8.2.1). Student t-test was used and p-value of  $\leq 0.05$  was  
532 considered significant (ns > 0.05, \* $p \leq 0.05$ , \*\* $p \leq 0.01$ , \*\*\* $p \leq 0.001$ , \*\*\*\* $p \leq 0.0001$ ).  
533 Statistics depicted on graphs show the mean and standard deviation about the mean  
534 unless stated otherwise. All data points shown are biological replicates, unless  
535 otherwise stated in the figure legend.

536

## 537 **ACKNOWLEDGEMENTS**

538 The authors would like to thank Claire Huang from the Centers for Diseases Control  
539 and Prevention gifting the DENV strains used in this paper. AMB is supported by a  
540 graduate studentship from Duke-NUS Medical School. EEO receives salary support  
541 from the National Medical Research Council of Singapore, through the Clinician-  
542 Scientist (Senior Investigator) Award.

543

## 544 REFERENCES

- 545 1. Kroeger A, Nathan M, Hombach J, World Health Organization TDRRGoD. Dengue.  
546 *Nat Rev Microbiol.* 2004;2(5):360-1.
- 547 2. Bhatt S, Gething PW, Brady OJ, Messina JP, Farlow AW, Moyes CL, et al. The  
548 global distribution and burden of dengue. *Nature.* 2013;496(7446):504-7.
- 549 3. Messina JP, Brady OJ, Golding N, Kraemer MUG, Wint GRW, Ray SE, et al. The  
550 current and future global distribution and population at risk of dengue. *Nat Microbiol.*  
551 2019;4(9):1508-15.
- 552 4. Verhagen LM, de Groot R. Dengue in children. *J Infect.* 2014;69 Suppl 1:S77-86.
- 553 5. Huy R, Buchy P, Conan A, Ngan C, Ong S, Ali R, et al. National dengue surveillance  
554 in Cambodia 1980-2008: epidemiological and virological trends and the impact of vector  
555 control. *Bull World Health Organ.* 2010;88(9):650-7.
- 556 6. Ooi EE, Goh KT, Gubler DJ. Dengue prevention and 35 years of vector control in  
557 Singapore. *Emerg Infect Dis.* 2006;12(6):887-93.
- 558 7. Egger JR, Ooi EE, Kelly DW, Woolhouse ME, Davies CR, Coleman PG.  
559 Reconstructing historical changes in the force of infection of dengue fever in Singapore:  
560 implications for surveillance and control. *Bull World Health Organ.* 2008;86(3):187-96.
- 561 8. Low JG, Ong A, Tan LK, Chatterji S, Chow A, Lim WY, et al. The early clinical  
562 features of dengue in adults: challenges for early clinical diagnosis. *PLoS Negl Trop Dis.*  
563 2011;5(5):e1191.
- 564 9. Huy BV, Hoa LNM, Thuy DT, Van Kinh N, Ngan TTD, Duyet LV, et al.  
565 Epidemiological and Clinical Features of Dengue Infection in Adults in the 2017 Outbreak in  
566 Vietnam. *Biomed Res Int.* 2019;2019:3085827.
- 567 10. Hsu JC, Hsieh CL, Lu CY. Trend and geographic analysis of the prevalence of  
568 dengue in Taiwan, 2010-2015. *Int J Infect Dis.* 2017;54:43-9.
- 569 11. Ang LW, Thein TL, Ng Y, Boudville IC, Chia PY, Lee VJM, et al. A 15-year review  
570 of dengue hospitalizations in Singapore: Reducing admissions without adverse consequences,  
571 2003 to 2017. *PLoS Negl Trop Dis.* 2019;13(5):e0007389.
- 572 12. Rowe EK, Leo YS, Wong JG, Thein TL, Gan VC, Lee LK, et al. Challenges in  
573 dengue fever in the elderly: atypical presentation and risk of severe dengue and hospital-  
574 acquired infection [corrected]. *PLoS Negl Trop Dis.* 2014;8(4):e2777.
- 575 13. Garcia-Rivera EJ, Rigau-Perez JG. Dengue severity in the elderly in Puerto Rico. *Rev*  
576 *Panam Salud Publica.* 2003;13(6):362-8.
- 577 14. Leo YS, Thein TL, Fisher DA, Low JG, Oh HM, Narayanan RL, et al. Confirmed  
578 adult dengue deaths in Singapore: 5-year multi-center retrospective study. *BMC Infect Dis.*  
579 2011;11:123.
- 580 15. Vicente CR, Cerutti Junior C, Froschl G, Romano CM, Cabidelle AS, Herberinger KH.  
581 Influence of demographics on clinical outcome of dengue: a cross-sectional study of 6703  
582 confirmed cases in Vitoria, Espirito Santo State, Brazil. *Epidemiol Infect.* 2017;145(1):46-53.
- 583 16. Figueiredo MA, Rodrigues LC, Barreto ML, Lima JW, Costa MC, Morato V, et al.  
584 Allergies and diabetes as risk factors for dengue hemorrhagic fever: results of a case control  
585 study. *PLoS Negl Trop Dis.* 2010;4(6):e699.
- 586 17. Pang J, Salim A, Lee VJ, Hibberd ML, Chia KS, Leo YS, et al. Diabetes with  
587 hypertension as risk factors for adult dengue hemorrhagic fever in a predominantly dengue  
588 serotype 2 epidemic: a case control study. *PLoS Negl Trop Dis.* 2012;6(5):e1641.
- 589 18. Khromava AY, Eidex RB, Weld LH, Kohl KS, Bradshaw RD, Chen RT, et al. Yellow  
590 fever vaccine: an updated assessment of advanced age as a risk factor for serious adverse  
591 events. *Vaccine.* 2005;23(25):3256-63.

- 592 19. Martin M, Weld LH, Tsai TF, Mootrey GT, Chen RT, Niu M, et al. Advanced age a  
593 risk factor for illness temporally associated with yellow fever vaccination. *Emerg Infect Dis.*  
594 2001;7(6):945-51.
- 595 20. Hayflick L, Moorhead PS. The serial cultivation of human diploid cell strains.  
596 *Experimental cell research.* 1961;25:585-621.
- 597 21. Nicholas W. Hayflick's Tragedy: The Rise and Fall of a Human Cell Line. *Science.*  
598 1976;192:125-7.
- 599 22. Jacobs JP, Jones CM, Baille JP. Characteristics of a Human Diploid Cell Designated  
600 MRC-5  
601 . *Nature.* 1970;227:3.
- 602 23. Olshansky SJ, Hayflick L. The Role of the WI-38 Cell Strain in Saving Lives and  
603 Reducing Morbidity. *AIMS Public Health.* 2017;4(2):127-38.
- 604 24. Shay JW, Wright WE. Hayflick, his limit, and cellular ageing. *Nature.* 2000;1:72-6.
- 605 25. Poleganov AM, Eminli S, Beissert T, Herz S, Moon JI, Goldman J, et al. Efficient  
606 Reprogramming of Human Fibroblasts and Blood-Derived Endothelial Progenitor Cells  
607 Using Nonmodified RNA for Reprogramming and Immune Evasion. *Human Gene Therapy.*  
608 2015;26(11):751-66.
- 609 26. Ferrucci L, Fabbri E. Inflammaging: chronic inflammation in ageing, cardiovascular  
610 disease, and frailty. *Nat Rev Cardiol.* 2018;15(9):505-22.
- 611 27. Wu X, Dao Thi VL, Huang Y, Billerbeck E, Saha D, Hoffmann HH, et al. Intrinsic  
612 Immunity Shapes Viral Resistance of Stem Cells. *Cell.* 2018;172(3):423-38 e25.
- 613 28. Rafferty E, Duclos P, Yactayo S, Schuster M. Risk of yellow fever vaccine-associated  
614 viscerotropic disease among the elderly: a systematic review. *Vaccine.* 2013;31(49):5798-  
615 805.
- 616 29. Lee CC, Hsu HC, Chang CM, Hong MY, Ko WC. Atypical presentations of dengue  
617 disease in the elderly visiting the ED. *Am J Emerg Med.* 2013;31(5):783-7.
- 618 30. Ang LW, Cutter J, James L, Goh KT. Seroepidemiology of dengue virus infection in  
619 the adult population in tropical Singapore. *Epidemiol Infect.* 2015;143(8):1585-93.
- 620 31. Chan KR, Wang X, Saron WA, Gan ES, Tan HC, Mok DZ, et al. Cross-reactive  
621 antibodies enhance live attenuated virus infection for increased immunogenicity. *Nat*  
622 *Microbiol.* 2016:16164.
- 623 32. Thein TL, Leo YS, Fisher DA, Low JG, Oh HM, Gan VC, et al. Risk factors for  
624 fatality among confirmed adult dengue inpatients in Singapore: a matched case-control study.  
625 *PLoS One.* 2013;8(11):e81060.
- 626 33. Salvioli S, Monti D, Lanzarini C, Conte M, Pirazzini C, Bacalini MG, et al. Immune  
627 system, cell senescence, aging and longevity--inflamm-aging reappraised. *Curr Pharm Des.*  
628 2013;19(9):1675-9.
- 629 34. Hsieh TH, Tsai TT, Chen CL, Shen TJ, Jhan MK, Tseng PC, et al. Senescence in  
630 Monocytes Facilitates Dengue Virus Infection by Increasing Infectivity. *Front Cell Infect*  
631 *Microbiol.* 2020;10:375.
- 632 35. Rackham OJ, Firas J, Fang H, Oates ME, Holmes ML, Knaupp AS, et al. A predictive  
633 computational framework for direct reprogramming between human cell types. *Nat Genet.*  
634 2016;48(3):331-5.
- 635 36. Kamaraj US, Chen J, Katwadi K, Ouyang JF, Yang Sun YB, Lim YM, et al.  
636 EpiMogrify Models H3K4me3 Data to Identify Signaling Molecules that Improve Cell Fate  
637 Control and Maintenance. *Cell Syst.* 2020;11(5):509-22 e10.
- 638 37. Choy MM, Ng DHL, Siriphanitchakorn T, Ng WC, Sundstrom KB, Tan HC, et al. A  
639 Non-structural 1 Protein G53D Substitution Attenuates a Clinically Tested Live Dengue  
640 Vaccine. *Cell Rep.* 2020;31(6):107617.

- 641 38. Goh KC, Tang CK, Norton DC, Gan ES, Tan HC, Sun B, et al. Molecular  
642 determinants of plaque size as an indicator of dengue virus attenuation. *Sci Rep*.  
643 2016;6:26100.
- 644 39. Johnson BW, Russell BJ, Lanciotti RS. Serotype-specific detection of dengue viruses  
645 in a fourplex real-time reverse transcriptase PCR assay. *J Clin Microbiol*. 2005;43(10):4977-  
646 83.
- 647 40. Lanciotti RS, Kosoy OL, Laven JJ, Velez JO, Lambert AJ, Johnson AJ, et al. Genetic  
648 and serologic properties of Zika virus associated with an epidemic, Yap State, Micronesia,  
649 2007. *Emerg Infect Dis*. 2008;14(8):1232-9.  
650

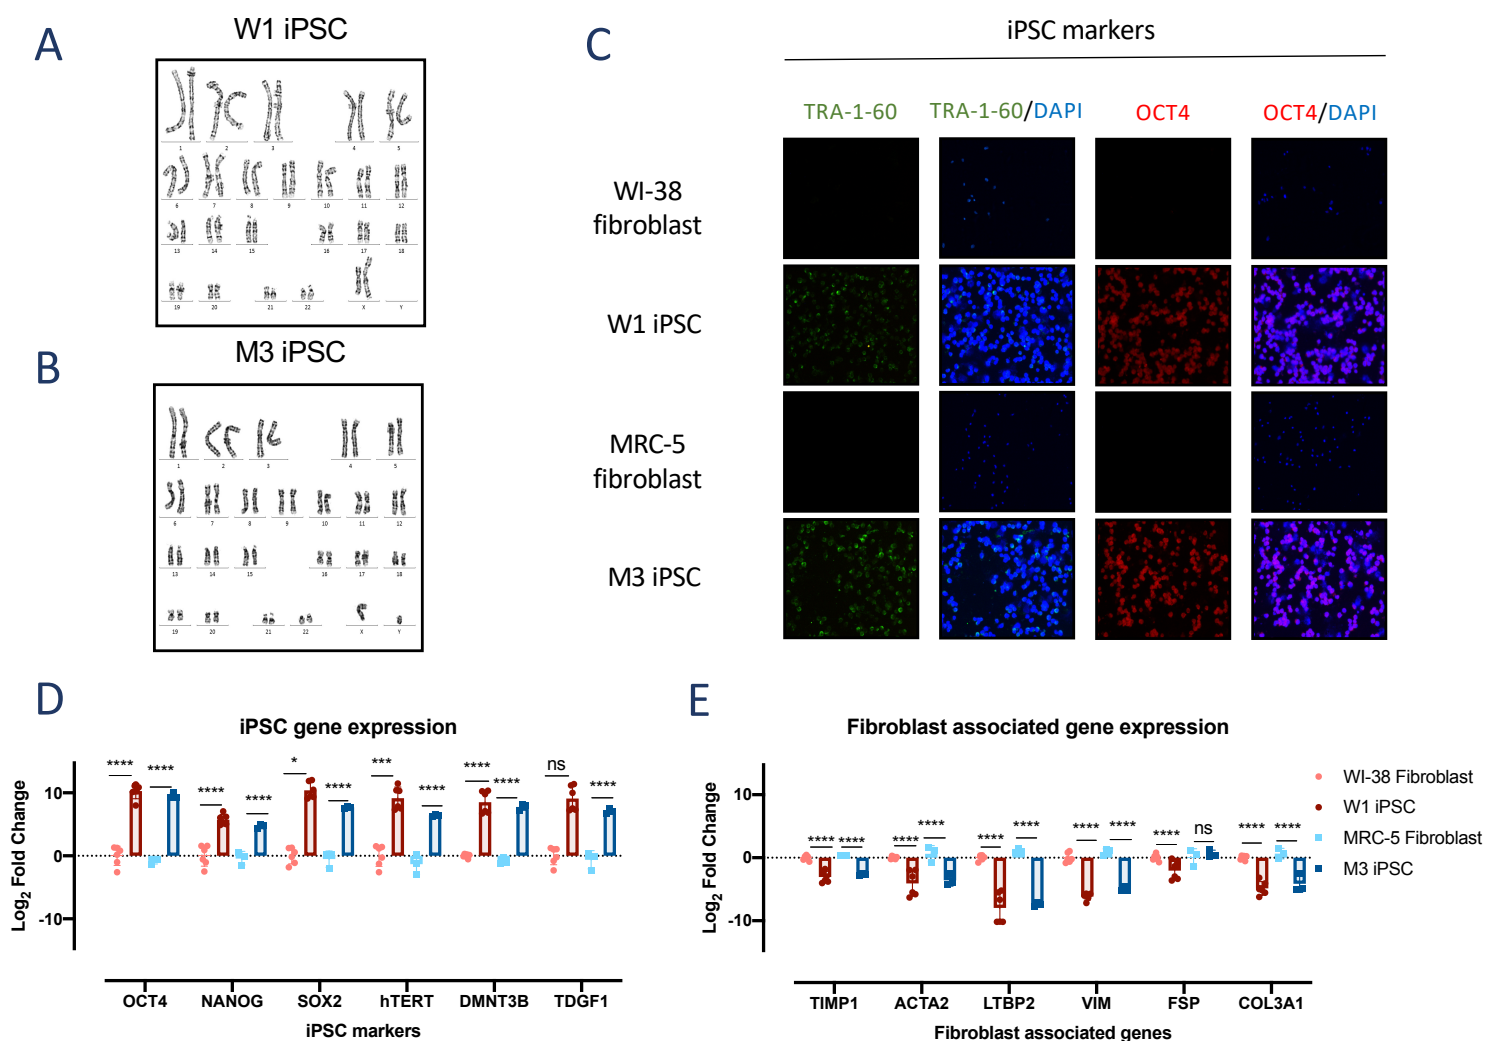

Figure 1

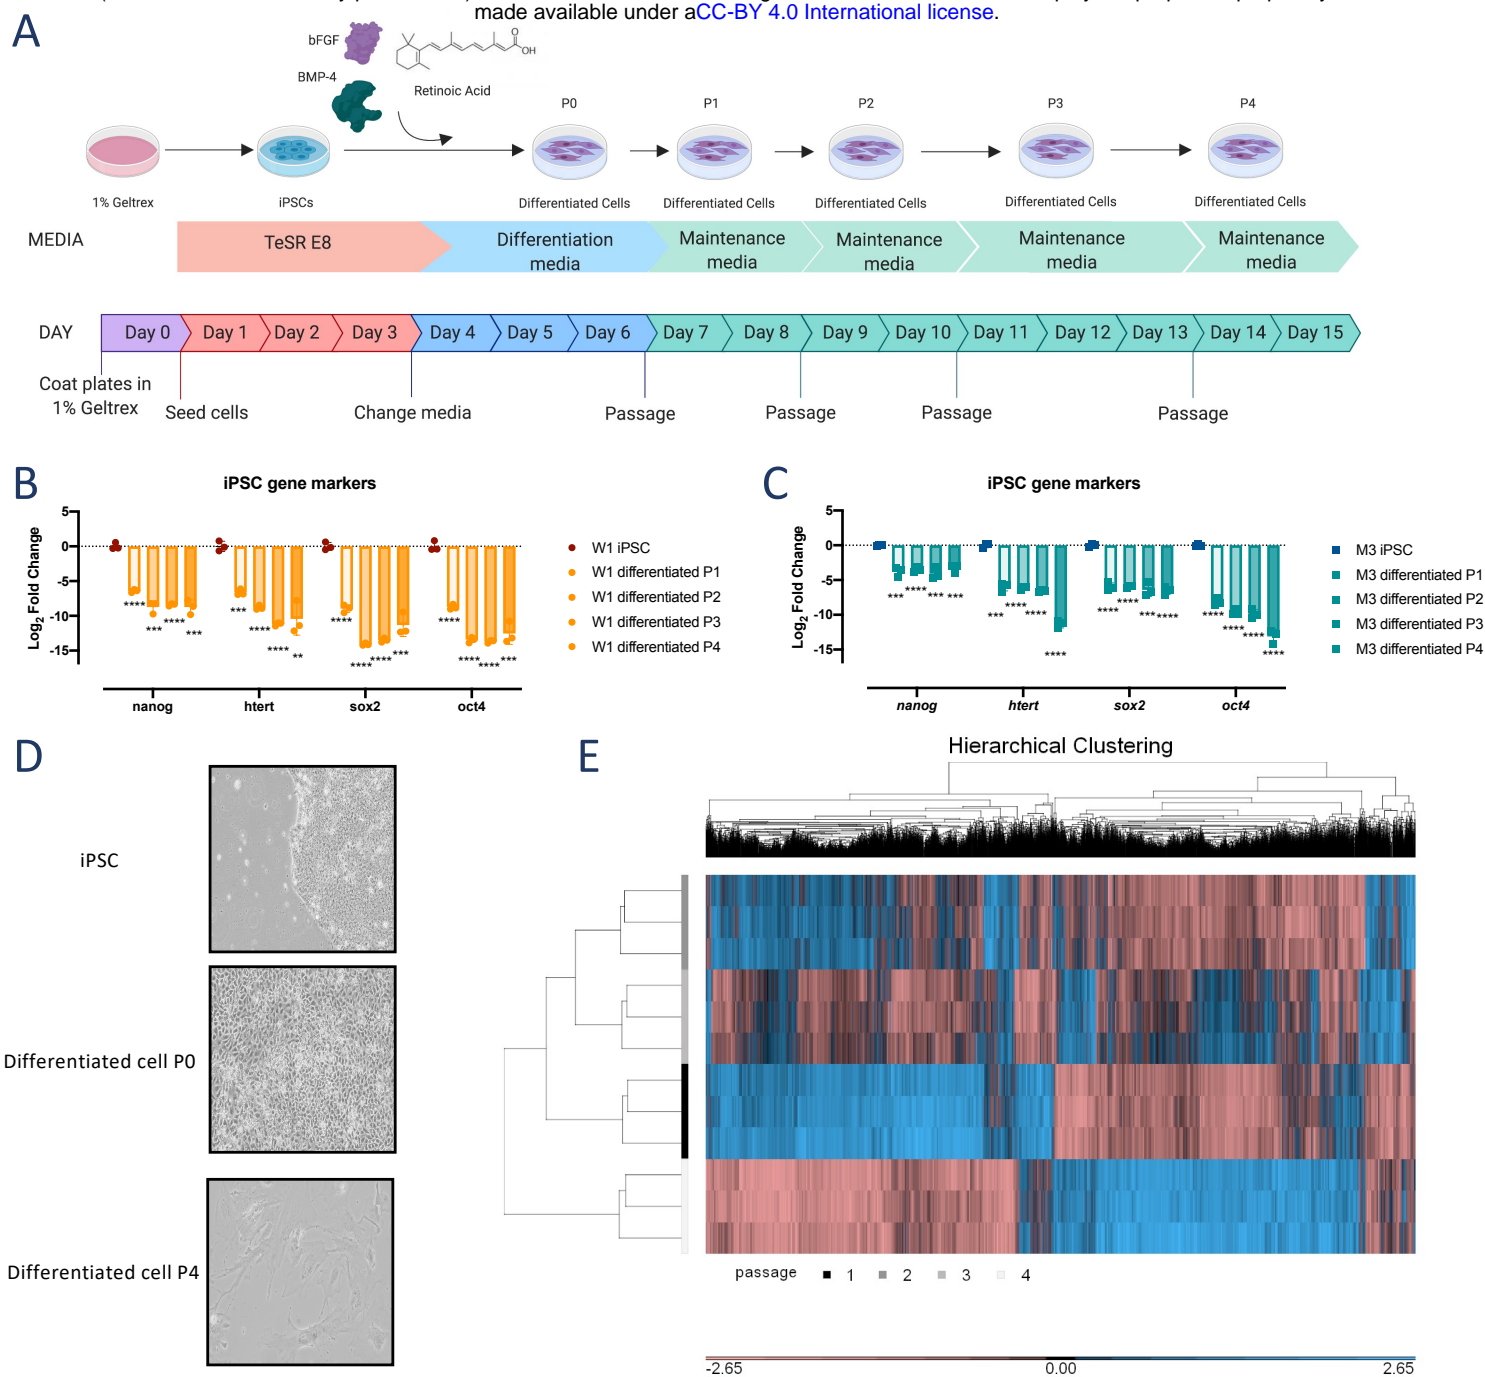

**Figure 2**



## A Up regulated pathways at passage 1 vs 2 (14)

Corticotropin-releasing hormone signaling pathway WP2355  
 Hematopoietic Stem Cell Differentiation WP2849  
 Hair Follicle Development: Cytodifferentiation (Part 3 of 3) WP2840  
 TGF-beta Signaling Pathway WP366  
 EGF/EGFR Signaling Pathway WP437  
 Serotonin and anxiety-related events WP3944  
 Serotonin and anxiety WP3947  
 TGF-beta Signaling in Thyroid Cells for Epithelial-Mesenchymal Transition WP3859  
 Estrogen signaling pathway WP712  
 Photodynamic therapy-induced NFE2L2 (NRF2) survival signaling WP3612

## Up regulated pathways at passage 1 vs 3 (133)

Complement and Coagulation Cascades WP558  
 Senescence and Autophagy in Cancer WP615  
 Primary Focal Segmental Glomerulosclerosis FSGS WP2572  
 Hair Follicle Development: Cytodifferentiation (Part 3 of 3) WP2840  
 Blood Clotting Cascade WP272  
 Hematopoietic Stem Cell Differentiation WP2849  
 miRNA regulation of p53 pathway in prostate cancer WP3982  
 Hypothesized Pathways in Pathogenesis of Cardiovascular Disease WP3668  
 DNA Damage Response (only ATM dependent) WP710  
 Vitamin D Receptor Pathway WP2877

## Up regulated pathways at passage 1 vs 4 (444)

Hypothesized Pathways in Pathogenesis of Cardiovascular Disease WP3668  
 Senescence and Autophagy in Cancer WP615  
 Genotoxicity pathway WP4286  
 Cells and Molecules involved in local acute inflammatory response WP4493  
 Platelet-mediated interactions with vascular and circulating cells WP4462  
 Differentiation Pathway WP2848  
 Nuclear Receptors Meta-Pathway WP2882  
 Primary Focal Segmental Glomerulosclerosis FSGS WP2572  
 Hippo-Merlin Signaling Dysregulation WP4541  
 PI3K-Akt Signaling Pathway WP4172

## B

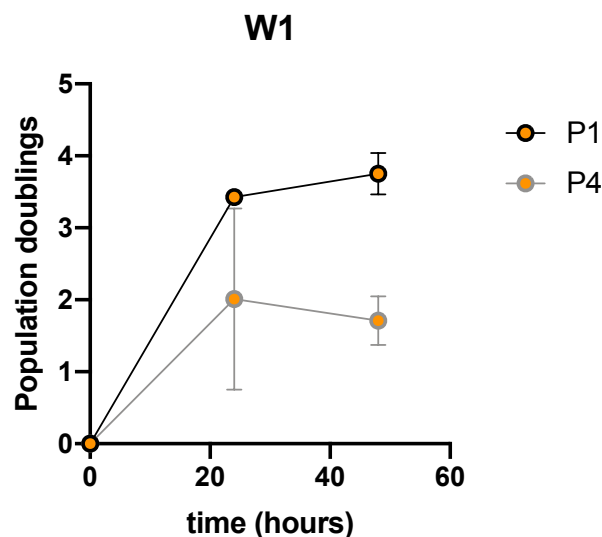

## C

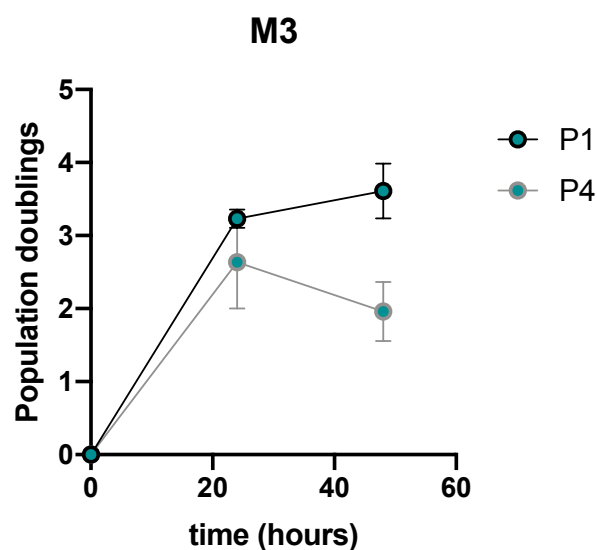

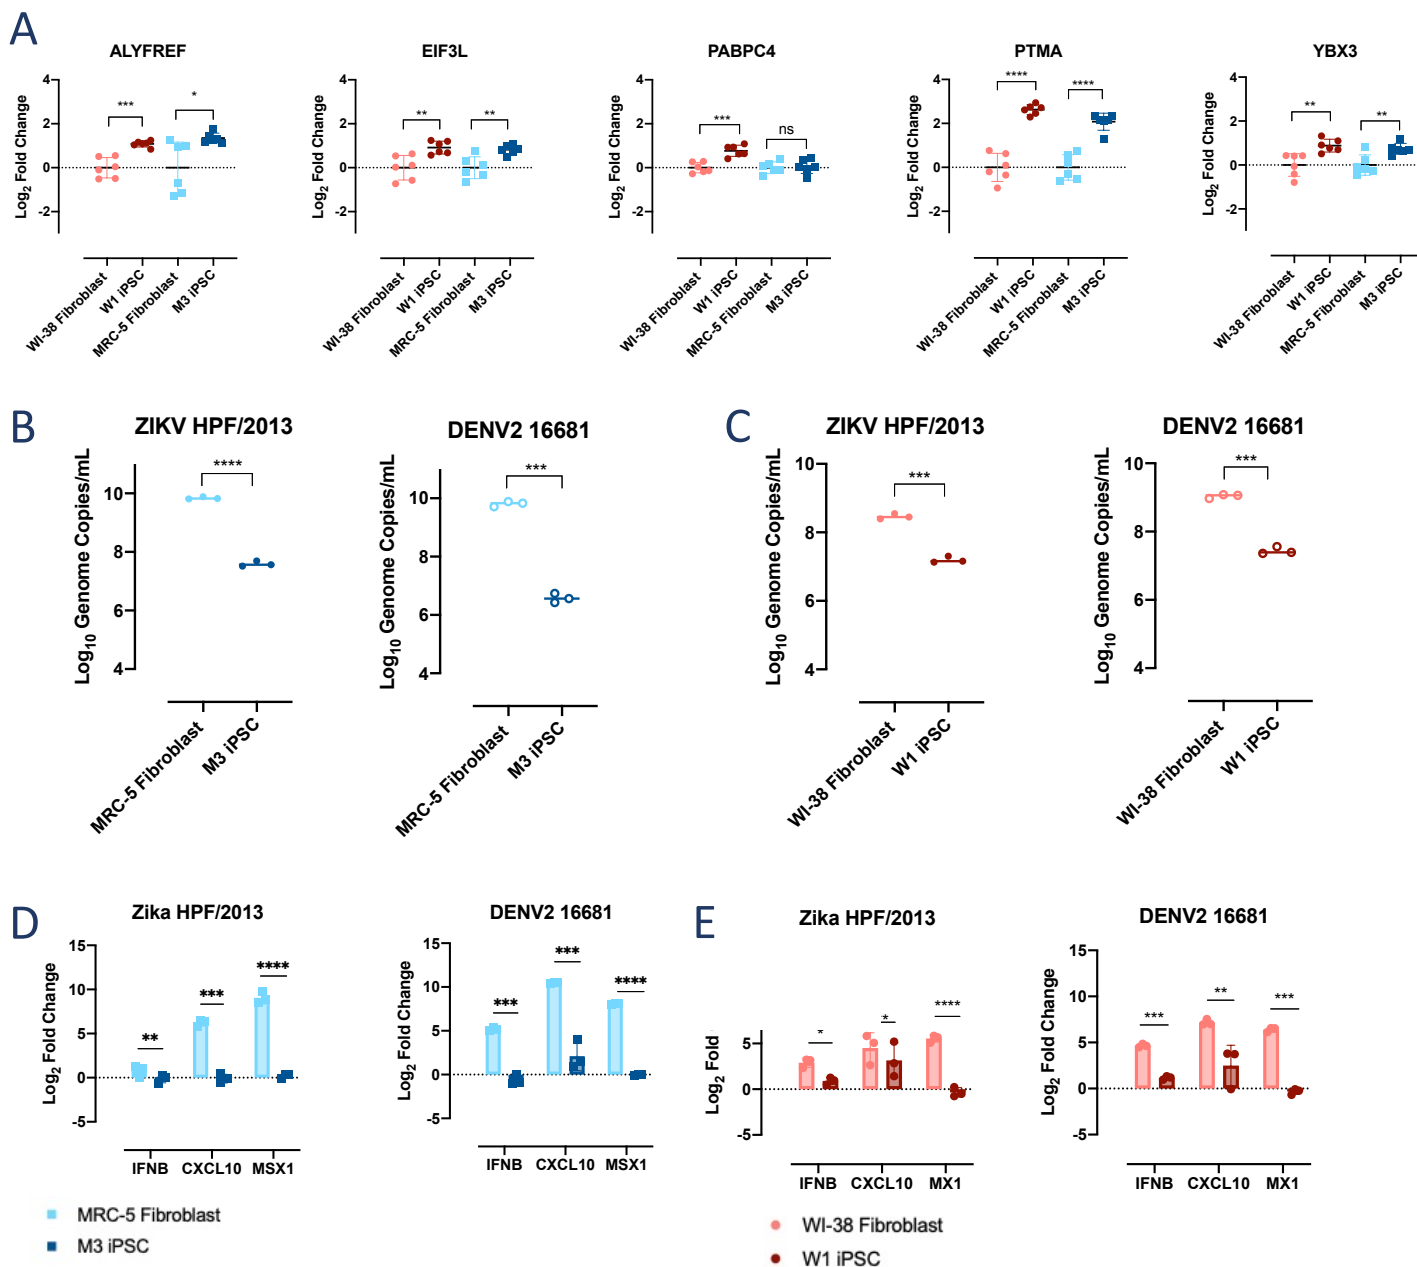

**Figure 4**

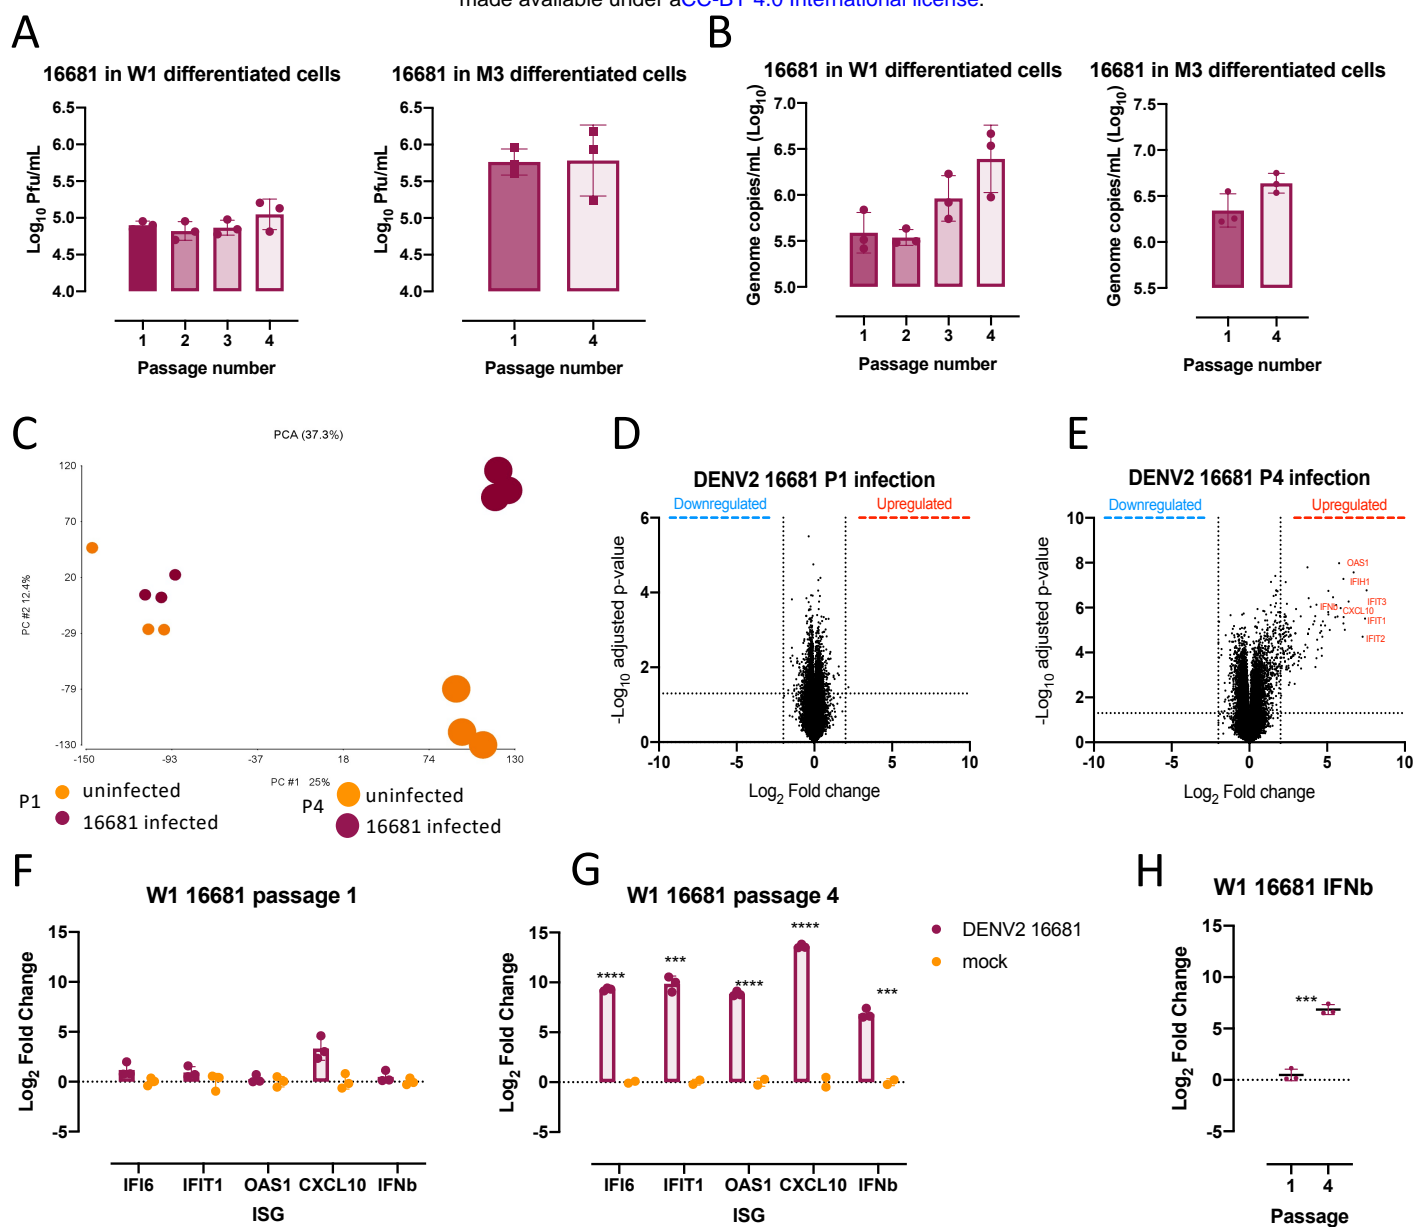

Figure 5

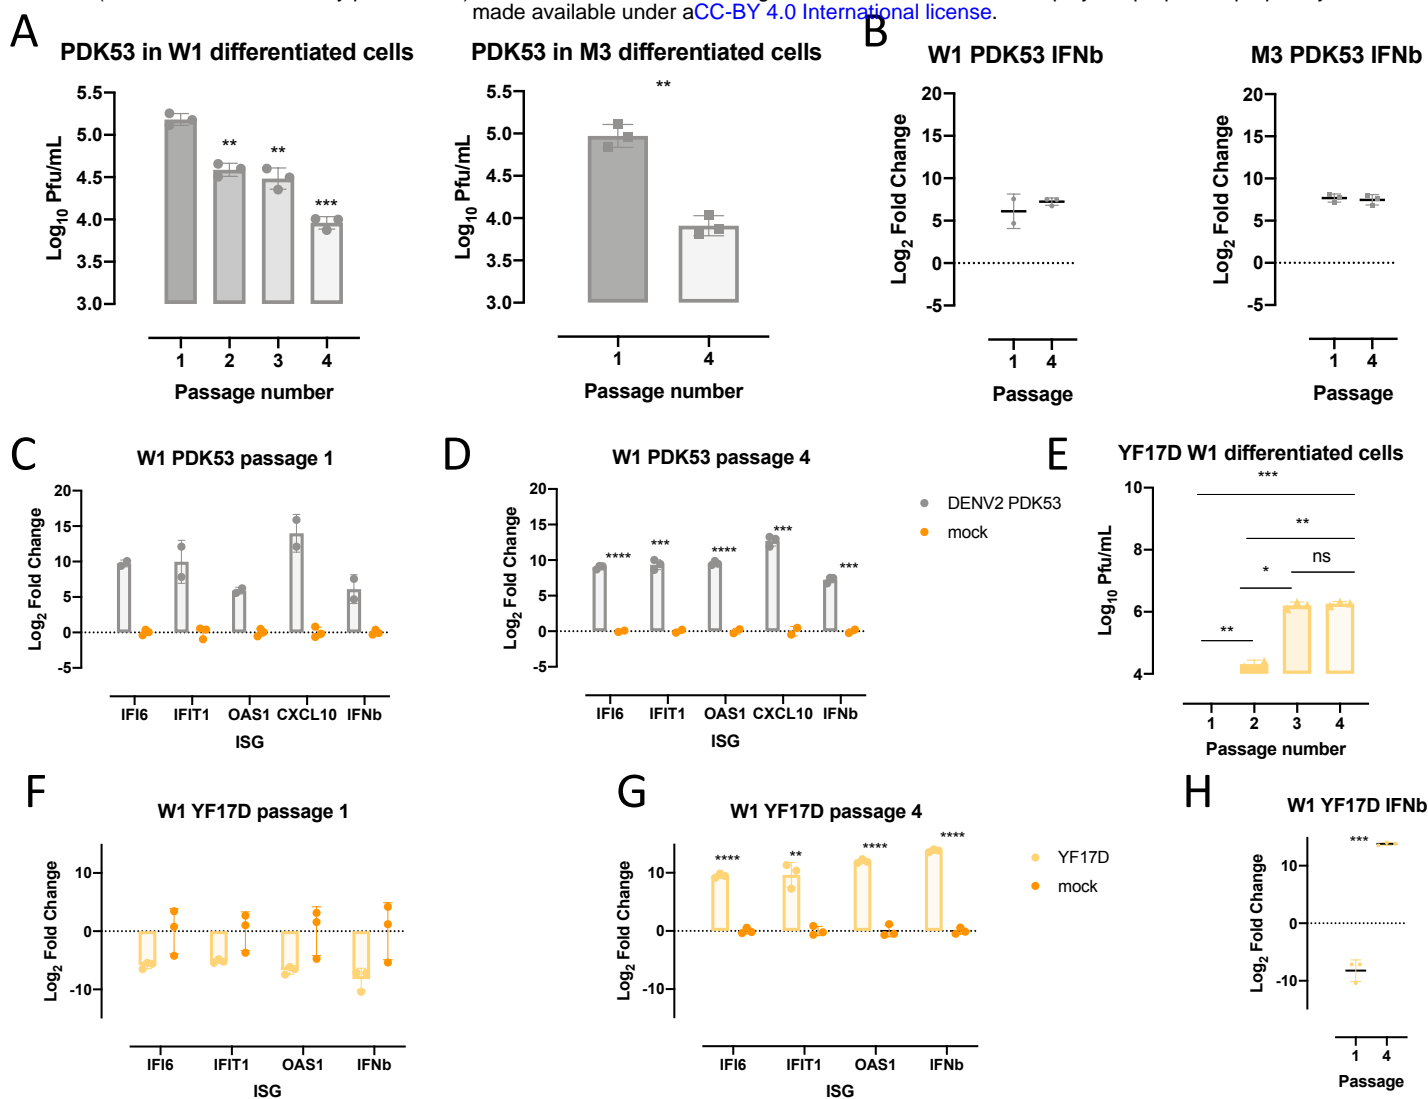

Figure 6

## 651 **Supplementary Figures Legends**

652 **Supplementary figure 1. Senescent fibroblast reprogrammed into iPSCs. (A)**  
653 MRC-5 derived iPSC colonies M1, M2, M4, M5 and M6 karyograms depicting normal  
654 male karyotype. Aberrant karyotype of WI-38 derived iPSC colony W2 and W3 with  
655 anomalies in translocation or chromosome copy number indicated on the karyogram.  
656 (GTG-banded cells analyzed, n=20. Karyograms made, n=5). **(B)** Alkaline  
657 phosphatase staining in WI-38 and W1 iPSC as well as MRC-5 and M3 iPSC. Cells  
658 with elevated phosphatase activity stained red/pink. **(C-D)** Quantitative PCR analysis  
659 of tri-lineage differentiation of W1 and M3 iPSCs into mesoderm, endoderm and  
660 ectoderm using appropriate lineage specific markers (C) and iPSC markers (D).  
661 Student t-test (n = 3) was used for statistical analysis \* $p \leq 0.05$ , \*\* $p \leq 0.01$ , \*\*\* $p \leq$   
662 0.001, \*\*\*\* $p \leq 0.0001$ .

663  
664 **Supplementary figure 2. Differentiated cells exhibit hallmarks of aging. (A)**  
665 Quantitative PCR of senescence associated genes in W1- and M3-derived  
666 differentiated cells at P1 and P4 (each dot represents 1 replicate). **(B-D)** Pathway  
667 analysis of downregulated genes in P2 (B), P3 (C) and P4(D) of W1 differentiated  
668 cells compared to P1 using the WikiPathways 2019 Human database. Significantly  
669 enriched downregulated pathways are coloured blue with the most significant ones  
670 shown at the top. Pathways that did not meet statistical significance of  $p < 0.05$  are  
671 shown in gray.

672  
673 **Supplementary figure 3. Flaviviral infection and IFN $\beta$  response in cells strains**  
674 **and cell strain derived iPSCs at 72 hpi.** Cell strains produce more infectious  
675 particles and a larger type I IFN response than their iPSC derivatives. **(A)** Zika  
676 HPF/2013 and DENV2 16681 infectious particles produced in WI-38 and W1 iPSCs  
677 at 72 hpi. **(B-C)** Quantitative PCR of IFN and ISGs in W1 (B) and M3 (C) iPSCs as  
678 well as their respective parental cell strains with or without ZIKV and DENV infection.  
679 Student t-test (n = 3) was used for statistical analysis \* $p \leq 0.05$ , \*\* $p \leq 0.01$ , \*\*\* $p \leq$   
680 0.001, \*\*\*\* $p \leq 0.0001$

681  
682 **Supplementary figure 4. The immune response to DENV2 16681 infection**  
683 **differs with in vitro passage of M3-derived differentiated cells. (A-B)** Gene  
684 expression of IFIT1, IFI6, IFN $\beta$ , OAS1, CXCL10, determined by qPCR, during  
685 DENV2 16681 infection in P1 (A) and P4 (B) M3-derived differentiated cells with or  
686 without DENV2 16681 infection. **(C)** IFN $\beta$  expression in infected M3-derived  
687 differentiated cells at P1 and P4.

688  
689 **Supplementary figure 5. The immune response to DENV2 PDK53 is consistent**  
690 **across passage number while YF17D generates a greater IFN $\beta$  at passage 4.**  
691 **(A-B)** Gene expression of IFIT1, IFI6, IFN $\beta$ , OAS1, CXCL10, determined by qPCR  
692 following DENV2 PDK53 or mock infection in P1 (A) and P4 (B) M3-derived  
693 differentiated cells. **(C)** Plaque titres of YF17D at 48hpi in M3 differentiated cells at  
694 passage 1 and 4. **(D-E)** Expression of genes in the canonical IFN $\beta$  response  
695 pathway (IFIT1, IFI6, IFN $\beta$ , OAS1, CXCL10) presented as Log<sub>2</sub>fold change in YF17D  
696 infected compared to uninfected cells, at P1 (D) and P4 (D) in M3- and W1-derived  
697 differentiated cells. **(F)** IFN $\beta$  gene expression at P1 and P4 M3- and W1-derived  
698 differentiated cells infected with YF17D and normalized to their respective uninfected  
699 controls.

**A** MRC-5 derived iPSCs

**WI-38 derived iPSCs**

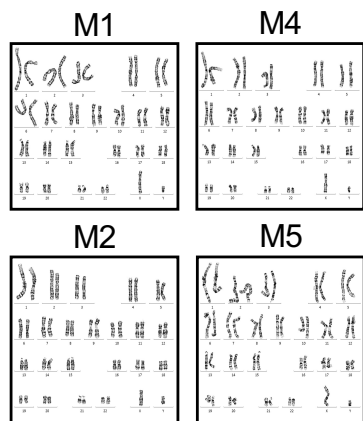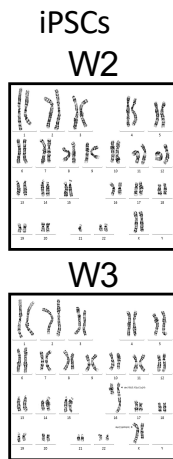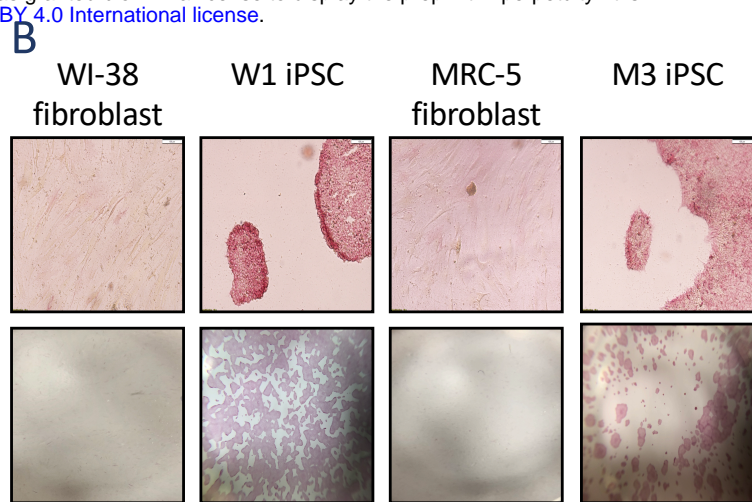

**C**

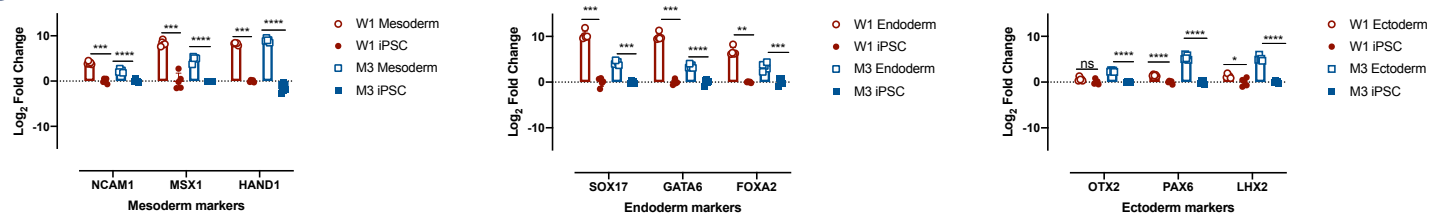

**D**

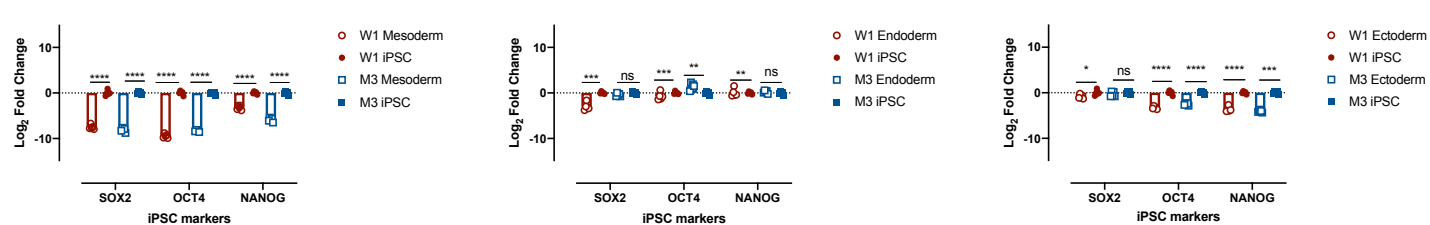

**Supplementary figure 1. Senescent fibroblast reprogrammed into iPSCs**

A

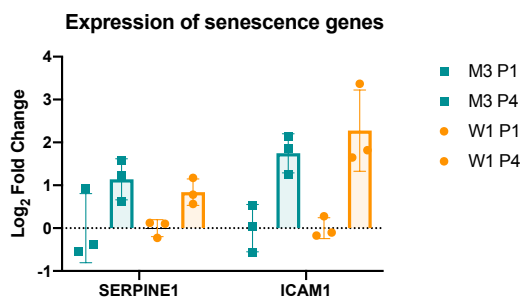

B Down regulated pathways at passage 1 vs 2 (85)

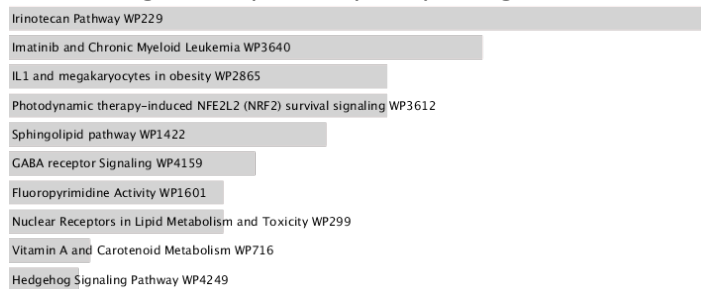

C Down regulated pathways at passage 1 vs 3 (332)

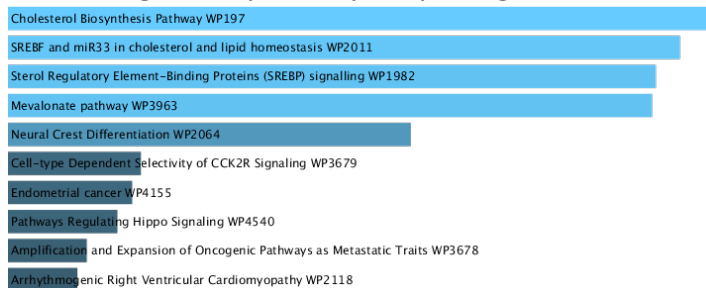

D Down regulated pathways at passage 1 vs 4 (821)

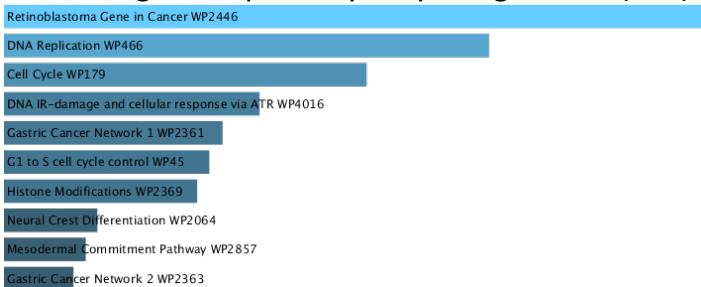

**Supplementary figure 2. Differentiated cells exhibit hallmarks of aging**

**A**

**ZIKV HPF/2013 infectious particles**

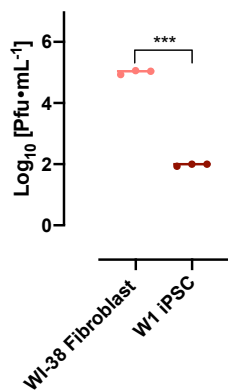

**DENV2 16681 infectious particles**

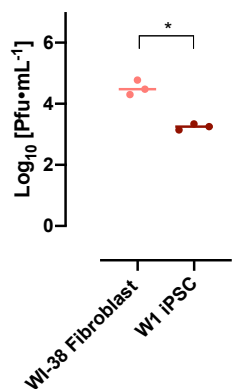

**B**

**ZIKV HPF/2013**

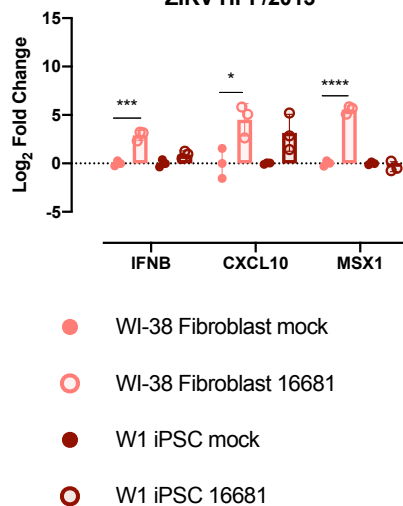

**DENV2 16681**

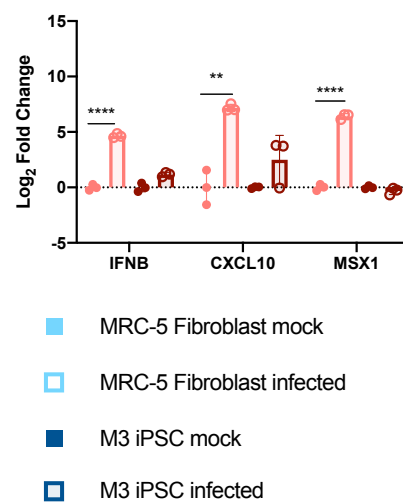

**C**

**ZIKV HPF/2013**

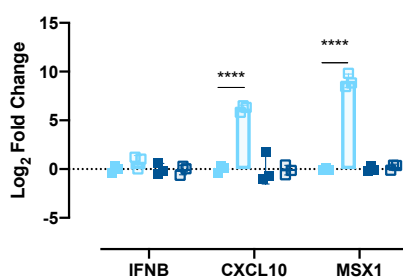

**DENV2 16681**

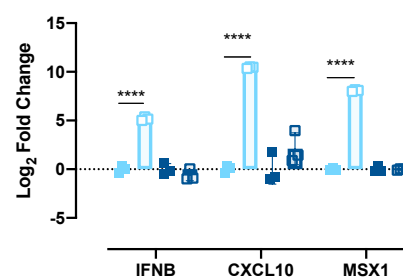

**Supplementary figure 3. Flaviviral infection and IFN $\beta$  response in cells strains and cell strain derived iPSCs at 72 hpi**



A

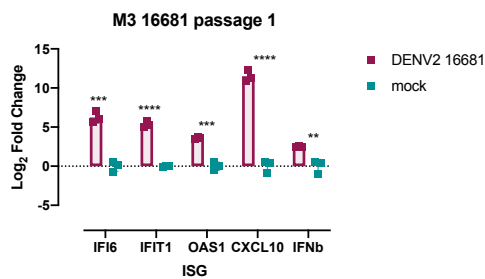

B

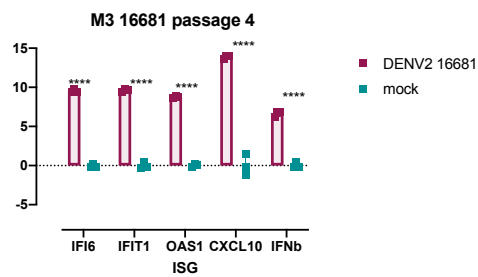

C

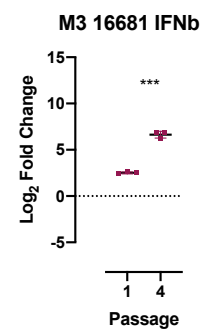

**Supplementary figure 4. The immune response to DENV2 16681 infection differs with in vitro passage of M3-derived differentiated cells.**

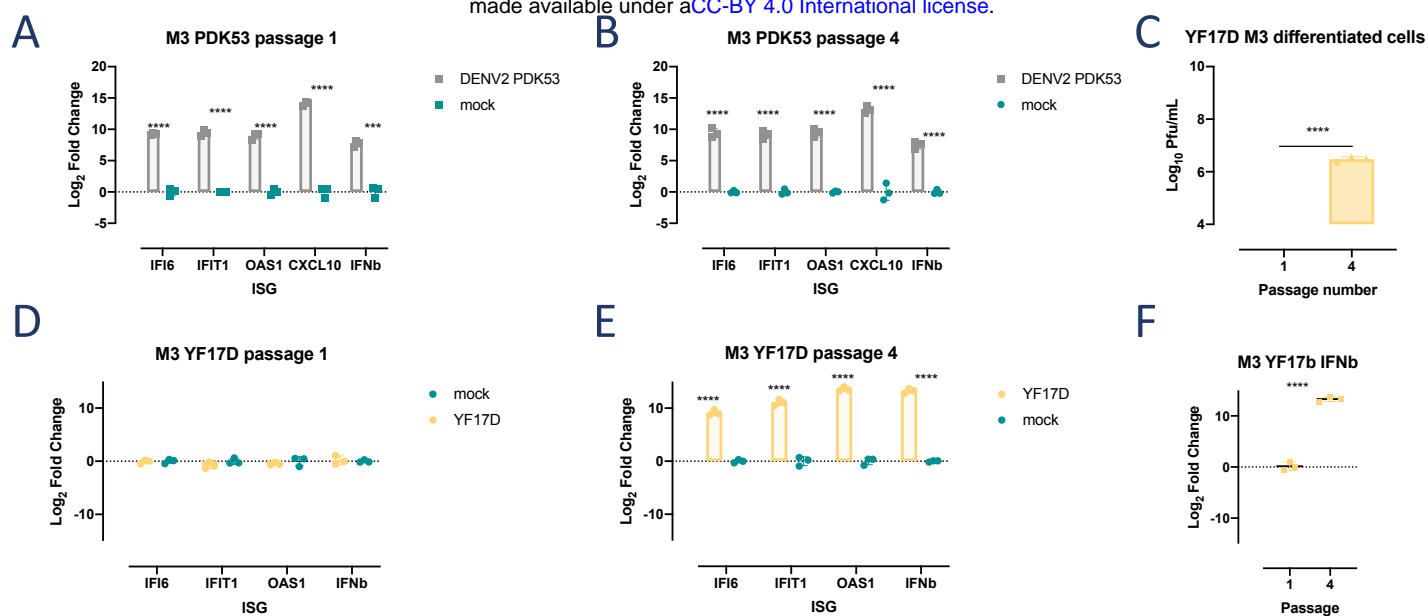

**Supplementary figure 5. The immune response to DENV2 PDK53 is consistent across passage number while YF17D generates a greater IFN $\beta$  at passage 4**

| #  | Name   | Direction | Sequence                 | Source                | #  | Name      | Direction | Sequence                                             | Source                 |
|----|--------|-----------|--------------------------|-----------------------|----|-----------|-----------|------------------------------------------------------|------------------------|
| 1  | dmnt3b | F         | CCCAGCTCTACCTTACCATCG    | PrimerBank            | 41 | ncam1     | F         | AGGAGACAGAAACGAAGCCA                                 | PrimerBank             |
| 2  |        | R         | GGTCCCTATTCCAAACTCCT     |                       | 42 |           | R         | GGTGTGGAAATGCTCTGGT                                  |                        |
| 3  | htert  | F         | CCGATTGTGAACATGGACTACG   | J. Liu et al., (2015) | 43 | ifn       | F         | GCTTGGATTCTACAAAGAAGCA                               | PrimerBank             |
| 4  |        | R         | CACGCTGAACAGTGCCTTC      |                       | 44 |           | R         | ATAGATGGTCAATGCGGCGTC                                |                        |
| 5  | oct4   | F         | CACTAAGGAAGGAATTGGGAACA  | PrimerBank            | 45 | mx1       | F         | GTTTCCGAAGTGAGCATCGCA                                | PrimerBank             |
| 6  |        | R         | GGGATTAATAACAAGGACATATTG |                       | 46 |           | R         | CTGCACAGGTGTCTCAGC                                   |                        |
| 7  | nanog  | F         | TTTGTGGCCCTGAAGAAAAC     | PrimerBank            | 47 | cxcl10    | F         | GTGGCATTCAAGGAGTACCTC                                | PrimerBank             |
| 8  |        | R         | AGGGCTGTCTCGAATAAGCAG    |                       | 48 |           | R         | TGATGGCCTCGATTCTGGATT                                |                        |
| 9  | sox2   | F         | TACAGCATGTCTACTCGCAG     | PrimerBank            | 49 | alyref    | F         | TATGATCGCTCTGGTCGAG                                  | PrimerBank             |
| 10 |        | R         | GAGGAAGAGGTAAACCACAGGG   |                       | 50 |           | R         | AGAGGGACGCCGTTGTACT                                  |                        |
| 11 | tdgf   | F         | CCCTCTTCTACGGACGGAA      | PrimerBank            | 51 | eif3l     | F         | GGAGGAGATTGACTTTCTTCGTT                              | PrimerBank             |
| 12 |        | R         | CAGGGAACACTCTTGGCAG      |                       | 52 |           | R         | TTGATTTGTCTACCAGGGAATG                               |                        |
| 13 | acta2  | F         | AAAAGACAGCTACGTGGGTGA    | PrimerBank            | 53 | pabpc4    | F         | AAGCCAATCCGCATCATGTG                                 | PrimerBank             |
| 14 |        | R         | GCCATGTTCTATCGGGTACTTC   |                       | 54 |           | R         | CTCTTGGGTCTCGAAGTGGAC                                |                        |
| 15 | Col3a1 | F         | TTGAAGGAGGATGTTCCCATCT   | PrimerBank            | 55 | ptma      | F         | GGAGGCTGACAATGAGGTAGA                                | PrimerBank             |
| 16 |        | R         | ACAGACACATATTTGGCATGGTT  |                       | 56 |           | R         | TGGTATCGACATCGTCATCCT                                |                        |
| 17 | fsp    | F         | GATGAGCAACTGGACAGCAA     | PrimerBank            | 57 | ybx3      | F         | ACCGGCGTCCCTACAATTAC                                 | PrimerBank             |
| 18 |        | R         | CTGGGTGCTTATCTGGGAG      |                       | 58 |           | R         | GGTTCAGTTGGTCTTCAC                                   |                        |
| 19 | Itbp2  | F         | AGCACCAACCCTGATCAAAC     | PrimerBank            | 59 | if16      | F         | GGTCTGCGATCCTGAATGGG                                 | PrimerBank             |
| 20 |        | R         | CTCATCGGGAATGACCTCCTC    |                       | 60 |           | R         | TCACTATCGAGATACTTGTGGGT                              |                        |
| 21 | timp1  | F         | AGAGTGCTGCGGATACTTCC     | PrimerBank            | 61 | ifit1     | F         | TTGATGACGATGAAATGCCTGA                               | PrimerBank             |
| 22 |        | R         | CCAACAGTGTAGTCTTGGTG     |                       | 62 |           | R         | CAGGTCACCAGACTCCTCAC                                 |                        |
| 23 | vim    | F         | TGCCGTTGAAGCTGCTAACTA    | PrimerBank            | 63 | oas1      | F         | TGCCAAGGTGGTAAAGGGTG                                 | PrimerBank             |
| 24 |        | R         | CCAGAGGGAGTGAATCCAGATTA  |                       | 64 |           | R         | CCGGCGATTTAACTGATCCTG                                |                        |
| 25 | otx2   | F         | CAAAGTGAGACTGCCAAAAGA    | PrimerBank            | 65 | serpine1  | F         | CCTGGGCCTTACAGGAAGG                                  | PrimerBank             |
| 26 |        | R         | TGGACAAGGGATCTGACAGTG    |                       | 66 |           | R         | GGTCCGATTCTCGTCAATAAAC                               |                        |
| 27 | lhx2   | F         | ATGCTGTTCCACAGTCTGTCG    | PrimerBank            | 67 | cdkn1a    | F         | GATCCAGCACATGAGCCAAG                                 | PrimerBank             |
| 28 |        | R         | GCATGGTCTCTCGGTGTC       |                       | 68 |           | R         | AAGGTCGCAAGGATTGTTTG                                 |                        |
| 29 | pax6   | F         | TGGGCAGGTATTACGAGACTG    | PrimerBank            | 69 | gabarapl1 | F         | ATGAAGTTCAGTACAAGGAGGA                               | PrimerBank             |
| 30 |        | R         | ACTCCGCTTATACTGGCTA      |                       | 70 |           | R         | GCTTTTGGAGCCTTCTCTACAAT                              |                        |
| 31 | sox17  | F         | GTGGACCGCACGGAAATTTG     | PrimerBank            | 71 | icam1     | F         | ATGCCCAGACATCTGTGTCC                                 | PrimerBank             |
| 32 |        | R         | GGAGATTCACACGGAGTCA      |                       | 72 |           | R         | GGGGTCTCTATGCCCAACAA                                 |                        |
| 33 | gata6  | F         | CTCAGTCTACGCTTCGCAT      | PrimerBank            | 73 | vtn       | F         | TGACCAAGAGTCATGCAAGGG                                | PrimerBank             |
| 34 |        | R         | GTCGAGGTCACTGAAACAGCA    |                       | 74 |           | R         | ACTCAGCCGTATAGTCTGTGC                                |                        |
| 35 | foxa2  | F         | GGAGCAGTACTATGCAGAGC     | PrimerBank            | 75 | Dengue 2  | F         | CAG GTT ATG GCA CTG TCA CGA T                        | Johnson et al., 2005   |
| 36 |        | R         | CGTGTTCATGCCGTTTCATCC    |                       | 76 |           | R         | CCA TCT GCA GCA ACA CCA TCT C                        |                        |
| 37 | hand1  | F         | CCATGCTCCACGAACCTTC      | PrimerBank            | 77 | probe     |           | /5HEX/CTCTCCGAG/ZEN/AACAGGCCCTCG<br>ACTTCAA/3IABKFQ/ | Lanciotti et al., 2008 |
| 38 |        | R         | CCTGGCTCAGGACCATAG       |                       | 78 | zika      | F         | CCG CTGCCC AAC ACA AG                                |                        |
| 39 | msx1   | F         | CGAGAGGACCCCGTGGATGCAGAG | PrimerBank            | 79 |           | R         | CCA CTA ACG TTC TTT TGC AGA CAT                      | PrimerBank             |
| 40 |        | R         | GGCGGCATCTTCAGCTTCCAG    |                       | 80 |           | probe     | -6-FAM-<br>AGCCTACCTTGACAAGCAGTCAGACAC<br>TCAA       |                        |

Supplementary table 1. List of qPCR primers.
